# Supplementary material for: Storage Duration and Added Docosahexaenoic Acid Modify the Rates of Esterified and Free Oxylipin Formation in Infant Milk Formula
Source: MDPI journal article supplement (doi:10.3390/pr11103045), 2023-10-23
Supplement: s1 [file s1]

## **Supplementary information**

### **Storage duration and added docosahexaenoic acid modify the rate of esterified and free oxylipin formation Infant Milk formula.**

Fernanda Furlan Gonçalves Dias<sup>1</sup>, Bianca Ferraz Teixeira<sup>1,2</sup>, Thais Maria Ferreira de Souza Vieira<sup>2</sup>, Juliana Maria Leite Nobrega de Moura Bell<sup>1,3</sup> and Ameer Y. Taha<sup>1\*</sup>

\*Correspondence: ataha@ucdavis.edu

**Table S1.** List of chemicals used in the present research.

| Chemical                                                                        | Cat#                                                                                                                                                                                                                                                                                                                                                                                                                                                                                                                        | Company                                          |
|---------------------------------------------------------------------------------|-----------------------------------------------------------------------------------------------------------------------------------------------------------------------------------------------------------------------------------------------------------------------------------------------------------------------------------------------------------------------------------------------------------------------------------------------------------------------------------------------------------------------------|--------------------------------------------------|
| Instant nonfat dry milk, canola oil, and lecithin                               | -                                                                                                                                                                                                                                                                                                                                                                                                                                                                                                                           | Local grocery store (Davis, CA, US).             |
| Maltodextrin                                                                    | -                                                                                                                                                                                                                                                                                                                                                                                                                                                                                                                           | Grain Processing Corporation (Muscatine, IA, US) |
| Docosahexaenoic acid ethyl ester (DHA)                                          | 9090310                                                                                                                                                                                                                                                                                                                                                                                                                                                                                                                     | Cayman Chemicals (Ann Arbor, MI, USA).           |
| Acetic acid                                                                     | 695092                                                                                                                                                                                                                                                                                                                                                                                                                                                                                                                      |                                                  |
| Butylated hydroxytoluene (BHT)                                                  | W218405-SAMPLE-K                                                                                                                                                                                                                                                                                                                                                                                                                                                                                                            |                                                  |
| Ethylenediaminetetraacetic acid disodium salt dihydrate (2Na-EDTA)              | E5134-50 g,                                                                                                                                                                                                                                                                                                                                                                                                                                                                                                                 | Sigma-Aldrich (St. Louis., MO, USA)              |
| Ethylenediaminetetraacetic acid (EDTA)                                          | EDS-100G                                                                                                                                                                                                                                                                                                                                                                                                                                                                                                                    |                                                  |
| Triphenylphosphine (TPP)                                                        | 3T84409                                                                                                                                                                                                                                                                                                                                                                                                                                                                                                                     |                                                  |
| Sodium carbonate (Na <sub>2</sub> CO <sub>3</sub> )                             | 791768-500G                                                                                                                                                                                                                                                                                                                                                                                                                                                                                                                 |                                                  |
| Sodium hydroxide (NaOH)                                                         | S5881-500G                                                                                                                                                                                                                                                                                                                                                                                                                                                                                                                  |                                                  |
| Acetonitrile                                                                    | A956-1                                                                                                                                                                                                                                                                                                                                                                                                                                                                                                                      | Fisher Scientific (Hampton, NH, USA)             |
| Chloroform HPLC grade                                                           | C607-4                                                                                                                                                                                                                                                                                                                                                                                                                                                                                                                      |                                                  |
| Ethyl acetate                                                                   | E196-4                                                                                                                                                                                                                                                                                                                                                                                                                                                                                                                      |                                                  |
| Methanol                                                                        | A454-4                                                                                                                                                                                                                                                                                                                                                                                                                                                                                                                      |                                                  |
| Methanol LC-MS grade                                                            | A456-4                                                                                                                                                                                                                                                                                                                                                                                                                                                                                                                      |                                                  |
| Deuterated and unlabeled oxylipin standards                                     | (d11-11,12-epoxyeicosatrienoic acid (EpETrE - Cat #10006413), d11-14,15-dihydroxyeicosatrienoic acid (DiHETrE - Cat #1008040), d4-6-keto-prostaglandin (PG) F1 $\alpha$ (Cat #315210), d4-9-hydroxyoctadecadienoic acid (HODE - Cat #338410), d4-leukotriene B4 (LTB4 - Cat #320110), d4- prostaglandin (PG) E2 (Cat #314010), d4-thromboxane B2 (TXB2 - Cat #319030), d6-20-hydroxyeicosatetraenoic acid (HETE - Cat #390030) and d8-5-hydroxyeicosatetraenoic acid (HETE - Cat #334230), and unlabeled oxylipin standards | Cayman Chemical (Ann Arbor, MI, USA).            |
| SPE cartridge (Waters Oasis HLB -3 cc, 60 mg sorbent, 30 $\mu$ m particle size) | WAT094226                                                                                                                                                                                                                                                                                                                                                                                                                                                                                                                   | Waters Corporation, Milford, CA, USA             |
| Vial inserts                                                                    | WAT094171                                                                                                                                                                                                                                                                                                                                                                                                                                                                                                                   |                                                  |
| Ultrafree-MC VV 0.1 $\mu$ m                                                     | UFC30VV00                                                                                                                                                                                                                                                                                                                                                                                                                                                                                                                   | Millipore Sigma, Burlington, MA, USA             |
| LCMS vials                                                                      | AR0-3911-13                                                                                                                                                                                                                                                                                                                                                                                                                                                                                                                 | Phenomenex, Torrance, CA, US                     |
| Pre-slit caps                                                                   | AR0-8972-13-B                                                                                                                                                                                                                                                                                                                                                                                                                                                                                                               |                                                  |

**Table S2.** Precursor ion, product ion, fragmentor voltage, collision energy, and retention time deuterated and oxylipins standards by UPLC-MS/MS.

| Compound abbreviation                   | Deuterated standards used | Precursor Ion (m/z) | Product Ion | Fragmentor voltage (V) | Collision Energy (V) | Retention time (min) |
|-----------------------------------------|---------------------------|---------------------|-------------|------------------------|----------------------|----------------------|
| <b>Deuterated standards (surrogate)</b> |                           |                     |             |                        |                      |                      |
| d-11-11(12)EpETrE                       | -                         | 330.2               | 167.2       | 80                     | 7                    | 23.5                 |
| d11-14,15-DiHETrE                       | -                         | 348.2               | 207.1       | 125                    | 10                   | 13.8                 |
| d4-6-keto-PGF1a                         | -                         | 373.3               | 167.1       | 90                     | 19                   | 4.7                  |
| d4-9HODE                                | -                         | 299.2               | 172.3       | 90                     | 13                   | 18                   |
| d4-LTB4                                 | -                         | 339.2               | 197.2       | 80                     | 10                   | 11.4                 |
| d4-PGE2                                 | -                         | 355.2               | 275.3       | 90                     | 7                    | 7                    |
| d4-TXB2                                 | -                         | 373.3               | 173.2       | 105                    | 10                   | 6                    |
| d6-20-HETE                              | -                         | 325.2               | 281.2       | 110                    | 7                    | 16.5                 |
| d8-5-HETE                               | -                         | 327.2               | 116.1       | 75                     | 7                    | 21.2                 |
| <b>LA derived oxylipin standards</b>    |                           |                     |             |                        |                      |                      |
| 9-HODE                                  | d4-9HODE                  | 295.2               | 171.1       | 120                    | 10                   | 18                   |
| 13-HODE                                 | d4-9HODE                  | 295.2               | 195.2       | 95                     | 13                   | 18                   |
| 9-oxo-ODE                               | d6-20-HETE                | 293.2               | 185.1       | 90                     | 13                   | 20                   |
| 13-oxo-ODE                              | d6-20-HETE                | 293.2               | 195.1       | 95                     | 13                   | 19.3                 |
| 9(10)-EpOME                             | d11-11(12)-EpETrE         | 295.3               | 171.1       | 100                    | 7                    | 22.8                 |
| 12(13)-EpOME                            | d11-11(12)-EpETrE         | 295.3               | 195.2       | 95                     | 7                    | 22.5                 |
| 9,10-DiHOME                             | d11-11(12)-EpETrE         | 313.2               | 201.2       | 130                    | 16                   | 12.42                |
| 12,13-DiHOME                            | d11-11(12)-EpETrE         | 313.2               | 183.2       | 130                    | 16                   | 12.7                 |
| 9,10,13-TriHOME                         | d4-TXB2                   | 329.2               | 171.1       | 110                    | 16                   | 6.7                  |
| 9,12,13-TriHOME                         | d4-TXB2                   | 329.2               | 211.1       | 125                    | 16                   | 6.6                  |
| <b>ALA-derived oxylipin standards</b>   |                           |                     |             |                        |                      |                      |
| 9-HOTrE                                 | d4-9HODE                  | 293.2               | 171.2       | 110                    | 4                    | 15.3                 |
| 13-HOTrE                                | d4-9HODE                  | 293.2               | 195.1       | 125                    | 10                   | 15.6                 |
| <b>DHA derived oxylipin standards</b>   |                           |                     |             |                        |                      |                      |
| 10(11)-EpDPE                            | d11-11(12)-EpETrE         | 343.2               | 153.2       | 90                     | 4                    | 23.6                 |
| 13(14)-EpDPE                            | d11-11(12)-EpETrE         | 343.2               | 193.2       | 80                     | 4                    | 23.4                 |
| 16(17)-EpDPE                            | d11-11(12)-EpETrE         | 343.2               | 233.2       | 130                    | 4                    | 23.3                 |
| 19(20)-EpDPE                            | d11-11(12)-EpETrE         | 343.2               | 241.2       | 130                    | 7                    | 22.5                 |
| 17-HDoHE                                | 17-HDoHE                  | 343.2               | 281.2       | 95                     | 4                    | 19.5                 |

Abbreviations: EpETrE (epoxyeicosatrienoic acid), HETE (hydroxyeicosatetraenoic acid), EpDPE (epoxydocosapentanoic acid), HDoHE (hydroxydocosahexaenoic acid), EpOME (epoxyoctadecenoic acid); DiHOME (dihydroxyoctadecenoic acid), TriHOME (trihydroxyoctadecenoic acid), HODE (hydroxyoctadecadienoic acid), oxo-ODE (oxo-octadecadienoic acid), HOTrE (hydroxyoctadecatrienoic acid) DiHETrE (dihydroxyicosatrienoic acid), HEPE (hydroxyeicosapentaenoic acid) and TXB2 (thromboxane B2).

**Table S3.** Relative standard deviation (RSD) for the recovery assays for Formulas 1 and 2 under 21 storage days.

| Compounds          | Day 0 |      | Day 01 |       | Day 03 |       | Day 07 |       | Day 14 |       | Day 21 |      |
|--------------------|-------|------|--------|-------|--------|-------|--------|-------|--------|-------|--------|------|
| LA derived         | F1    | F2   | F1     | F2    | F1     | F2    | F1     | F2    | F1     | F2    | F1     | F2   |
| 9-HODE             | 3.0%  | 8.4% | 6.6%   | 4.8%  | 9.4%   | 11.4% | 3.1%   | 0.6%  | 5.6%   | 16.8% | 2.3%   | 6.1% |
| 13-HODE            | 3.1%  | 4.9% | 6.6%   | 4.8%  | 9.4%   | 12.7% | 3.1%   | 0.6%  | 5.6%   | 11.5% | 2.3%   | 6.1% |
| 9-oxo-ODE          | 4.3%  | 7.9% | 5.6%   | 6.7%  | 6.0%   | 9.9%  | 7.9%   | 5.7%  | 3.1%   | 10.2% | 0.8%   | 4.7% |
| 13-oxo-ODE         | 9.5%  | 7.7% | 5.6%   | 6.7%  | 17.9%  | 10.8% | 7.9%   | 5.7%  | 2.9%   | 9.1%  | 0.8%   | 4.9% |
| 12(13)-EpOME       | 9.2%  | 5.3% | 8.9%   | 9.2%  | 9.3%   | 5.8%  | 1.7%   | 0.6%  | 5.4%   | 10.1% | 7.9%   | 3.6% |
| 9(10)-EpOME        | 11.8% | 6.3% | 9.3%   | 9.8%  | 9.1%   | 6.4%  | 1.7%   | 0.6%  | 5.4%   | 10.2% | 7.8%   | 3.9% |
| 9,10-DiHOME        | 4.3%  | 6.8% | 4.1%   | 4.4%  | 11.3%  | 11.9% | 1.0%   | 5.9%  | 5.0%   | 9.8%  | 2.0%   | 6.0% |
| 12,13-DiHOME       | 4.3%  | 6.7% | 3.4%   | 4.3%  | 11.5%  | 11.9% | 1.0%   | 5.9%  | 5.0%   | 9.9%  | 4.5%   | 6.0% |
| 9,10,13-TriHOME    | 10.5% | 8.0% | 4.3%   | 5.9%  | 9.0%   | 7.6%  | 7.0%   | 7.2%  | 3.9%   | 6.7%  | 2.1%   | 5.5% |
| 9,12,13-TriHOME    | 4.0%  | 5.4% | 9.0%   | 4.1%  | 9.0%   | 6.1%  | 5.2%   | 9.1%  | 1.7%   | 12.0% | 2.8%   | 4.2% |
| <b>ALA derived</b> |       |      |        |       |        |       |        |       |        |       |        |      |
| 9-HOTrE            | 2.3%  | 4.8% | 6.0%   | 4.8%  | 9.4%   | 15.7% | 2.9%   | 7.2%  | 5.6%   | 18.3% | 2.3%   | 5.0% |
| 13-HOTrE           | 2.2%  | 4.8% | 6.5%   | 5.0%  | 10.0%  | 16.7% | 3.0%   | 0.6%  | 5.5%   | 16.6% | 2.1%   | 8.5% |
| <b>DHA derived</b> |       |      |        |       |        |       |        |       |        |       |        |      |
| 10(11)EpDPE        | 8.4%  | 5.7% | 9.3%   | 6.6%  | 7.0%   | 18.2% | 1.7%   | 10.8% | 5.3%   | 9.4%  | 8.0%   | 4.2% |
| 13(14)EpDPE        | 8.6%  | 6.3% | 9.3%   | 13.5% | 7.4%   | 15.6% | 1.7%   | 7.5%  | 5.6%   | 12.0% | 7.9%   | 3.9% |
| 16(17)-EpDPE       | 8.9%  | 3.6% | 9.3%   | 17.8% | 7.4%   | 16.0% | 1.7%   | 12.4% | 5.4%   | 16.7% | 7.7%   | 5.7% |
| 19(20)-EpDPE       | 9.0%  | 3.5% | 4.1%   | 17.1% | 8.5%   | 13.7% | 6.6%   | 7.1%  | 5.0%   | 17.3% | 0.9%   | 5.7% |
| 17-HDoHE           | 3.3%  | 4.8% | 6.5%   | 4.9%  | 10.2%  | 16.7% | 3.1%   | 0.6%  | 5.6%   | 18.6% | 2.2%   | 6.0% |

**Table S4.** Concentration of total, free, and esterified 9-HODE in Formula 1- (no DHA) -F1 and Formula 2 (with DHA) - F2 from day 0 to 21.

| 9-HODE    |                          |                          |                               |                      |
|-----------|--------------------------|--------------------------|-------------------------------|----------------------|
| Compound  | Total Oxylipins (nmol/L) | Free Oxylipins (nmol/L)* | Esterified Oxylipins (nmol/L) | Esterified Oxylipins |
| F1 Day 0  | 56.47 ± 3.88             | 10.86 ± 2.96             | 45.62 ± 4.43                  | 81%                  |
| F1 Day 1  | 69.13 ± 1.56             | 9.56 ± 2.79              | 59.57 ± 4.18                  | 86%                  |
| F1 Day 3  | 68.06 ± 5.39             | 13.54 ± 1.04             | 54.52 ± 3.43                  | 80%                  |
| F1 Day 7  | 60.47 ± 5.69             | 15.26 ± 3.51             | 45.21 ± 12.17                 | 75%                  |
| F1 Day 14 | 124.62 ± 13.26           | 21.67 ± 10.3             | 102.95 ± 17.88                | 83%                  |
| F1 Day 21 | 133.19 ± 6.86            | 68.86 ± 11.17            | 64.33 ± 12.03                 | 48%                  |
| F2 Day 0  | 68.5 ± 13.31             | 21.03 ± 1.02             | 47.48 ± 12.03                 | 69%                  |
| F2 Day 1  | 61.18 ± 2.38             | 15.25 ± 4.98             | 45.93 ± 5.67                  | 75%                  |
| F2 Day 3  | 70.26 ± 13.47            | 18.42 ± 1.04             | 51.84 ± 9.95                  | 74%                  |
| F2 Day 7  | 131.36 ± 5.63            | 22.88 ± 1.26             | 108.49 ± 11.08                | 83%                  |
| F2 Day 14 | 137.49 ± 1.4             | 40.96 ± 4.9              | 96.52 ± 21.49                 | 70%                  |
| F2 Day 21 | 184.44 ± 21.03           | 32.62 ± 3.95             | 151.82 ± 21.49                | 82%                  |

\*Data previously published (Teixeira et al., 2022)

**Table S5.** Concentration of total, free, and esterified 13-HODE in Formula 1- (no DHA) -F1 and Formula 2 (with DHA) - F2 from day 0 to 21.

| 13-HODE   |                          |                         |                               |                      |
|-----------|--------------------------|-------------------------|-------------------------------|----------------------|
| Compound  | Total Oxylipins (nmol/L) | Free Oxylipins (nmol/L) | Esterified Oxylipins (nmol/L) | Esterified Oxylipins |
| F1 Day 0  | 202.17 ± 6.94            | 44.39 ± 12.4            | 157.78 ± 19.33                | 78%                  |
| F1 Day 1  | 235.4 ± 2.18             | 39.53 ± 5.21            | 195.87 ± 15.56                | 83%                  |
| F1 Day 3  | 325.8 ± 24.73            | 53.6 ± 10.19            | 272.21 ± 12.16                | 84%                  |
| F1 Day 7  | 274.37 ± 19.85           | 58.07 ± 8.22            | 216.31 ± 17.13                | 79%                  |
| F1 Day 14 | 326.85 ± 20.85           | 74.54 ± 4.18            | 252.31 ± 2.23                 | 77%                  |
| F1 Day 21 | 392.81 ± 54.14           | 173.69 ± 48.02          | 219.12 ± 59.15                | 56%                  |
| F2 Day 0  | 371.77 ± 58.75           | 65.24 ± 4.37            | 306.53 ± 59.15                | 82%                  |
| F2 Day 1  | 317.63 ± 16.23           | 51.28 ± 15.45           | 266.34 ± 30.65                | 84%                  |
| F2 Day 3  | 353.38 ± 61.25           | 62.8 ± 15.1             | 290.57 ± 47.83                | 82%                  |
| F2 Day 7  | 549.8 ± 24.55            | 75.11 ± 20.92           | 474.69 ± 40.93                | 86%                  |
| F2 Day 14 | 503.03 ± 16.2            | 114.1 ± 58.96           | 388.93 ± 54.83                | 77%                  |
| F2 Day 21 | 556.71 ± 64.51           | 73.46 ± 20.4            | 483.25 ± 78.73                | 87%                  |

\*Data previously published (Teixeira et al., 2022)

**Table S6.** Concentration of total, free, and esterified 9-oxo-ODE in Formula 1- (no DHA) -F1 and Formula 2 (with DHA) - F2 from day 0 to 21.

| 9-oxo-ODE |                          |                           |                               |                      |
|-----------|--------------------------|---------------------------|-------------------------------|----------------------|
| Compound  | Total Oxylipins (nmol/L) | Free Oxylipins (nmol/L) * | Esterified Oxylipins (nmol/L) | Esterified Oxylipins |
| F1 Day 0  | 19.75 ± 0.41             | 12.33 ± 2.04              | 7.42 ± 1.81                   | 38%                  |
| F1 Day 1  | 21.97 ± 1.05             | 9.01 ± 1.72               | 12.96 ± 5.09                  | 59%                  |
| F1 Day 3  | 22.16 ± 1.91             | 12.38 ± 4.82              | 9.78 ± 1.94                   | 44%                  |
| F1 Day 7  | 22.45 ± 1.12             | 10.59 ± 0.82              | 11.87 ± 3.3                   | 53%                  |
| F1 Day 14 | 18.68 ± 0.41             | 12.74 ± 3.09              | 5.94 ± 1.37                   | 32%                  |
| F1 Day 21 | 19.96 ± 0.74             | 14.91 ± 1.48              | 5.05 ± 0.55                   | 25%                  |
| F2 Day 0  | 25.56 ± 1.27             | 12.03 ± 1.82              | 13.54 ± 0.55                  | 53%                  |
| F2 Day 1  | 21.53 ± 3.86             | 8.46 ± 2.53               | 13.07 ± 3.28                  | 61%                  |
| F2 Day 3  | 25.68 ± 4.49             | 11.39 ± 2.5               | 14.29 ± 4.93                  | 56%                  |
| F2 Day 7  | 32.33 ± 4.01             | 13.74 ± 3.96              | 18.58 ± 7.25                  | 57%                  |
| F2 Day 14 | 18.97 ± 2.61             | 10.98 ± 1.34              | 7.98 ± 2.79                   | 42%                  |
| F2 Day 21 | 25.24 ± 3.09             | 7.35 ± 0.35               | 17.89 ± 3.13                  | 71%                  |

\*Data previously published (Teixeira et al., 2022)

**Table S7.** Concentration of total, free, and esterified 13-oxo-ODE in Formula 1- (no DHA) -F1 and Formula 2 (with DHA) - F2 from day 0 to 21.

| 13-oxo-ODE |                          |                           |                               |                      |
|------------|--------------------------|---------------------------|-------------------------------|----------------------|
| Compound   | Total Oxylipins (nmol/L) | Free Oxylipins (nmol/L) * | Esterified Oxylipins (nmol/L) | Esterified Oxylipins |
| F1 Day 0   | 11.87 ± 0.33             | 9.72 ± 1.71               | 2.14 ± 2                      | 18%                  |
| F1 Day 1   | 15.55 ± 1.68             | 6.95 ± 1.73               | 8.59 ± 3.52                   | 55%                  |
| F1 Day 3   | 18.22 ± 3.41             | 10.27 ± 2.22              | 7.95 ± 0.98                   | 44%                  |
| F1 Day 7   | 15.24 ± 1.22             | 10.43 ± 1.57              | 4.8 ± 0.42                    | 32%                  |
| F1 Day 14  | 13.53 ± 2.36             | 11.27 ± 1.99              | 2.27 ± 0.95                   | 17%                  |
| F1 Day 21  | 12.6 ± 1.55              | 12.11 ± 0.7               | 0.5 ± 3.64                    | 4%                   |
| F2 Day 0   | 20.94 ± 3.53             | 11.1 ± 1.84               | 9.83 ± 3.64                   | 47%                  |
| F2 Day 1   | 18.56 ± 1.58             | 11.17 ± 1.73              | 7.38 ± 3.04                   | 40%                  |
| F2 Day 3   | 20.08 ± 2.12             | 13.09 ± 2.76              | 6.98 ± 4.84                   | 35%                  |
| F2 Day 7   | 30.83 ± 2.65             | 12.05 ± 3.04              | 18.78 ± 0.97                  | 61%                  |
| F2 Day 14  | 15.98 ± 2.16             | 11.45 ± 7.26              | 4.53 ± 5.66                   | 28%                  |
| F2 Day 21  | 20.39 ± 2.32             | 9.65 ± 3.03               | 10.74 ± 1.38                  | 53%                  |

\*Data previously published (Teixeira et al., 2022)

**Table S8.** Concentration of total, free, and esterified 9,10-EpOME in Formula 1- (no DHA) -F1 and Formula 2 (with DHA) - F2 from day 0 to 21.

| <b>9,10-EpOME</b> |                                     |                                      |                                          |                                 |
|-------------------|-------------------------------------|--------------------------------------|------------------------------------------|---------------------------------|
| <b>Compound</b>   | <b>Total Oxylipins<br/>(nmol/L)</b> | <b>Free Oxylipins<br/>(nmol/L) *</b> | <b>Esterified Oxylipins<br/>(nmol/L)</b> | <b>Esterified<br/>Oxylipins</b> |
| F1 Day 0          | 24.05 ± 3.78                        | 6.87 ± 1.43                          | 17.18 ± 4.93                             | 71%                             |
| F1 Day 1          | 26.07 ± 2.08                        | 3.57 ± 0.48                          | 22.51 ± 5.92                             | 86%                             |
| F1 Day 3          | 26.34 ± 2.83                        | 7.73 ± 3.92                          | 18.61 ± 2.3                              | 71%                             |
| F1 Day 7          | 30.57 ± 1.73                        | 5.04 ± 0.6                           | 25.52 ± 3.99                             | 83%                             |
| F1 Day 14         | 34.9 ± 3.97                         | 5.75 ± 0.05                          | 29.15 ± 4.68                             | 84%                             |
| F1 Day 21         | 36.17 ± 2.02                        | 15.53 ± 4.46                         | 20.64 ± 4.34                             | 57%                             |
| F2 Day 0          | 41.24 ± 5.27                        | 7.16 ± 1.1                           | 34.09 ± 4.34                             | 83%                             |
| F2 Day 1          | 40.77 ± 1.02                        | 6.04 ± 0.85                          | 34.73 ± 1.82                             | 85%                             |
| F2 Day 3          | 43.8 ± 3.9                          | 7.07 ± 1.1                           | 36.73 ± 4.29                             | 84%                             |
| F2 Day 7          | 51.16 ± 8.72                        | 10.49 ± 0.63                         | 40.67 ± 9.35                             | 79%                             |
| F2 Day 14         | 59.57 ± 4.8                         | 7.34 ± 1.16                          | 52.23 ± 5.67                             | 88%                             |
| F2 Day 21         | 73.44 ± 9.28                        | 8.65 ± 1.3                           | 64.79 ± 10.04                            | 88%                             |

\*Data previously published (Teixeira et al., 2022)

**Table S9.** Concentration of total, free, and esterified 12(13)-EpOME in Formula 1- (no DHA) -F1 and Formula 2 (with DHA) - F2 from day 0 to 21.

| <b>12(13)-EpOME</b> |                                     |                                      |                                          |                                 |
|---------------------|-------------------------------------|--------------------------------------|------------------------------------------|---------------------------------|
| <b>Compound</b>     | <b>Total Oxylipins<br/>(nmol/L)</b> | <b>Free Oxylipins<br/>(nmol/L) *</b> | <b>Esterified Oxylipins<br/>(nmol/L)</b> | <b>Esterified<br/>Oxylipins</b> |
| F1 Day 0            | 346.26 ± 48.27                      | 18.05 ± 5.92                         | 328.21 ± 47.57                           | 95%                             |
| F1 Day 1            | 359.8 ± 41.43                       | 17.75 ± 4.97                         | 342.06 ± 26.57                           | 95%                             |
| F1 Day 3            | 378.64 ± 20.51                      | 26.44 ± 15.04                        | 352.2 ± 36.32                            | 93%                             |
| F1 Day 7            | 428.97 ± 35.53                      | 24.76 ± 8.97                         | 404.22 ± 35.16                           | 94%                             |
| F1 Day 14           | 446.91 ± 32.51                      | 65.49 ± 18.09                        | 381.43 ± 21.88                           | 85%                             |
| F1 Day 21           | 506.42 ± 29.47                      | 59.23 ± 15.96                        | 447.19 ± 136.28                          | 88%                             |
| F2 Day 0            | 380.58 ± 137.19                     | 22.39 ± 3.24                         | 358.19 ± 136.28                          | 94%                             |
| F2 Day 1            | 558.19 ± 110.4                      | 20.76 ± 1.1                          | 537.42 ± 111.42                          | 96%                             |
| F2 Day 3            | 681.63 ± 169.99                     | 24.25 ± 4.58                         | 657.38 ± 165.47                          | 96%                             |
| F2 Day 7            | 651.48 ± 84.18                      | 30.59 ± 1.55                         | 620.88 ± 84.88                           | 95%                             |
| F2 Day 14           | 765.09 ± 66.05                      | 41.03 ± 3.03                         | 724.06 ± 63.19                           | 95%                             |
| F2 Day 21           | 1055.06 ± 203.74                    | 30.21 ± 4.84                         | 1024.85 ± 203.83                         | 97%                             |

\*Data previously published (Teixeira et al., 2022)

**Table S10.** Concentration of total, free, and esterified 9,10-DiHOME in Formula 1- (no DHA) -F1 and Formula 2 (with DHA) - F2 from day 0 to 21.

| <b>9,10-DiHOME</b> |                                     |                                      |                                          |                                 |
|--------------------|-------------------------------------|--------------------------------------|------------------------------------------|---------------------------------|
| <b>Compound</b>    | <b>Total Oxylipins<br/>(nmol/L)</b> | <b>Free Oxylipins<br/>(nmol/L) *</b> | <b>Esterified Oxylipins<br/>(nmol/L)</b> | <b>Esterified<br/>Oxylipins</b> |
| F1 Day 0           | 19.59 ± 1.24                        | 10.74 ± 3.24                         | 8.85 ± 4.37                              | 45%                             |
| F1 Day 1           | 21.53 ± 1.26                        | 15.29 ± 2.04                         | 6.24 ± 1.59                              | 29%                             |
| F1 Day 3           | 24.45 ± 1.45                        | 15.99 ± 1.6                          | 8.46 ± 2.67                              | 35%                             |
| F1 Day 7           | 19.44 ± 2.61                        | 16.45 ± 2.06                         | 2.99 ± 2.08                              | 15%                             |
| F1 Day 14          | 17.47 ± 2.22                        | 15.63 ± 1.15                         | 1.84 ± 2.29                              | 11%                             |
| F1 Day 21          | 13.68 ± 1.18                        | 9.93 ± 3.09                          | 3.75 ± 2.55                              | 27%                             |
| F2 Day 0           | 29.05 ± 4.07                        | 17.26 ± 2.87                         | 11.79 ± 1.37                             | 41%                             |
| F2 Day 1           | 25.53 ± 2.16                        | 25.14 ± 3.27                         | 0.39 ± 0                                 | 2%                              |
| F2 Day 3           | 25.32 ± 3.95                        | 18.08 ± 2.98                         | 7.24 ± 2.66                              | 29%                             |
| F2 Day 7           | 25.92 ± 1.57                        | 20.03 ± 5.18                         | 5.89 ± 5.32                              | 23%                             |
| F2 Day 14          | 20.27 ± 2.12                        | 13.61 ± 6.47                         | 6.66 ± 4.59                              | 33%                             |
| F2 Day 21          | 20.56 ± 3.17                        | 11.67 ± 1.65                         | 8.9 ± 4.08                               | 43%                             |

\*Data previously published (Teixeira et al., 2022)

**Table S11.** Concentration of total, free, and esterified 12,13-DiHOME in Formula 1- (no DHA) -F1 and Formula 2 (with DHA) - F2 from day 0 to 21.

| <b>12,13-DiHOME</b> |                                     |                                      |                                          |                                 |
|---------------------|-------------------------------------|--------------------------------------|------------------------------------------|---------------------------------|
| <b>Compound</b>     | <b>Total Oxylipins<br/>(nmol/L)</b> | <b>Free Oxylipins<br/>(nmol/L) *</b> | <b>Esterified Oxylipins<br/>(nmol/L)</b> | <b>Esterified<br/>Oxylipins</b> |
| F1 Day 0            | 30.58 ± 1.74                        | 12.6 ± 0.6                           | 17.98 ± 1.83                             | 59%                             |
| F1 Day 1            | 35.47 ± 3.17                        | 11.96 ± 2.99                         | 23.52 ± 3.05                             | 66%                             |
| F1 Day 3            | 33.05 ± 1.31                        | 13.94 ± 3.99                         | 19.11 ± 1.55                             | 58%                             |
| F1 Day 7            | 35.89 ± 0.78                        | 12.59 ± 0.77                         | 23.3 ± 3.7                               | 65%                             |
| F1 Day 14           | 35.12 ± 2.47                        | 20.08 ± 6.16                         | 15.04 ± 5.74                             | 43%                             |
| F1 Day 21           | 44.12 ± 3.06                        | 19.22 ± 3.13                         | 24.9 ± 7.64                              | 56%                             |
| F2 Day 0            | 34.63 ± 3.41                        | 16.89 ± 4.25                         | 17.74 ± 7.64                             | 51%                             |
| F2 Day 1            | 37.67 ± 3.76                        | 13.13 ± 4.57                         | 24.54 ± 8.08                             | 65%                             |
| F2 Day 3            | 37.27 ± 2.58                        | 12.16 ± 2.41                         | 25.11 ± 1.26                             | 67%                             |
| F2 Day 7            | 41.92 ± 3.34                        | 13.79 ± 3.66                         | 28.13 ± 5.78                             | 67%                             |
| F2 Day 14           | 45.71 ± 2.52                        | 18.62 ± 7.54                         | 27.09 ± 10.05                            | 59%                             |
| F2 Day 21           | 50.2 ± 2.93                         | 12.17 ± 3.29                         | 38.02 ± 4.41                             | 76%                             |

\*Data previously published (Teixeira et al., 2022)



**Table S12.** Concentration of total, free, and esterified 9,10,13-TriHOME in Formula 1- (no DHA) -F1 and Formula 2 (with DHA) - F2 from day 0 to 21.

| <b>9,10,13-TriHOME</b> |                                 |                                  |                                      |                             |
|------------------------|---------------------------------|----------------------------------|--------------------------------------|-----------------------------|
| <b>Compound</b>        | <b>Total Oxylipins (nmol/L)</b> | <b>Free Oxylipins (nmol/L) *</b> | <b>Esterified Oxylipins (nmol/L)</b> | <b>Esterified Oxylipins</b> |
| F1 Day 0               | 423.35 ± 9.16                   | 126.67 ± 15.82                   | 296.67 ± 8.13                        | 70%                         |
| F1 Day 1               | 440.87 ± 26.04                  | 114.4 ± 2.03                     | 326.47 ± 24.49                       | 74%                         |
| F1 Day 3               | 433.65 ± 16.36                  | 111.22 ± 17.33                   | 322.43 ± 4.89                        | 74%                         |
| F1 Day 7               | 467.39 ± 9.79                   | 122.16 ± 4.18                    | 345.22 ± 13.93                       | 74%                         |
| F1 Day 14              | 525.04 ± 12.23                  | 109.78 ± 15.49                   | 415.26 ± 13.69                       | 79%                         |
| F1 Day 21              | 552.65 ± 13.39                  | 129.98 ± 3.34                    | 422.67 ± 13.13                       | 76%                         |
| F2 Day 0               | 517.61 ± 6.35                   | 142.29 ± 17.52                   | 375.33 ± 182.52                      | 73%                         |
| F2 Day 1               | 495.12 ± 19.13                  | 102.24 ± 30.39                   | 392.88 ± 30.14                       | 79%                         |
| F2 Day 3               | 448.76 ± 75.03                  | 120.64 ± 20.94                   | 328.12 ± 58.32                       | 73%                         |
| F2 Day 7               | 524.12 ± 51.13                  | 154.02 ± 0.23                    | 370.1 ± 174.54                       | 71%                         |
| F2 Day 14              | 539.17 ± 25.57                  | 113.52 ± 28.32                   | 425.65 ± 26.35                       | 79%                         |
| F2 Day 21              | 536.97 ± 59.47                  | 126.96 ± 16.48                   | 410.01 ± 45.6                        | 76%                         |

\*Data previously published (Teixeira et al., 2022)

**Table S13.** Concentration of total, free, and esterified 9,12,13-TriHOME in Formula 1- (no DHA) -F1 and Formula 2 (with DHA) - F2 from day 0 to 21.

| <b>9,12,13-TriHOME</b> |                                 |                                  |                                      |                             |
|------------------------|---------------------------------|----------------------------------|--------------------------------------|-----------------------------|
| <b>Compound</b>        | <b>Total Oxylipins (nmol/L)</b> | <b>Free Oxylipins (nmol/L) *</b> | <b>Esterified Oxylipins (nmol/L)</b> | <b>Esterified Oxylipins</b> |
| F1 Day 0               | 514.16 ± 17.52                  | 128.37 ± 36.59                   | 385.79 ± 12.77                       | 75%                         |
| F1 Day 1               | 474.49 ± 33.18                  | 118.15 ± 42.8                    | 356.34 ± 21.86                       | 75%                         |
| F1 Day 3               | 482.09 ± 23.68                  | 117.71 ± 51.48                   | 364.38 ± 9.72                        | 76%                         |
| F1 Day 7               | 604.38 ± 43.09                  | 133.33 ± 49.28                   | 471.05 ± 43.07                       | 78%                         |
| F1 Day 14              | 572.55 ± 53.31                  | 120.85 ± 54.47                   | 451.7 ± 41.27                        | 79%                         |
| F1 Day 21              | 556.64 ± 12.57                  | 145.98 ± 51.25                   | 410.66 ± 15.52                       | 74%                         |
| F2 Day 0               | 563.99 ± 28.61                  | 154.72 ± 43.58                   | 409.27 ± 19.22                       | 73%                         |
| F2 Day 1               | 508.62 ± 16.97                  | 135.61 ± 58.41                   | 373.01 ± 14.05                       | 73%                         |
| F2 Day 3               | 536.59 ± 38.69                  | 131.92 ± 63.54                   | 404.67 ± 20.28                       | 75%                         |
| F2 Day 7               | 610.3 ± 24.43                   | 166.66 ± 64.06                   | 443.63 ± 1.14                        | 73%                         |
| F2 Day 14              | 600.37 ± 16.19                  | 154.56 ± 58.96                   | 445.81 ± 18.75                       | 74%                         |
| F2 Day 21              | 661.38 ± 38.44                  | 141.18 ± 64.69                   | 520.2 ± 46.71                        | 79%                         |

\*Data previously published (Teixeira et al., 2022)

**Table S14.** Concentration of total, free, and esterified 9-HOTrE in Formula 1- (no DHA) -F1 and Formula 2 (with DHA) - F2 from day 0 to 21.

| 9-HOTrE   |                          |                           |                               |                      |
|-----------|--------------------------|---------------------------|-------------------------------|----------------------|
| Compound  | Total Oxylipins (nmol/L) | Free Oxylipins (nmol/L) * | Esterified Oxylipins (nmol/L) | Esterified Oxylipins |
| F1 Day 0  | 4.78 ± 0.46              | 1.29 ± 0.28               | 3.49 ± 0.63                   | 73%                  |
| F1 Day 1  | 5.89 ± 0.45              | 1.06 ± 0.21               | 4.83 ± 0.28                   | 82%                  |
| F1 Day 3  | 8.35 ± 0.23              | 1.24 ± 0.2                | 7.11 ± 0.42                   | 85%                  |
| F1 Day 7  | 9.99 ± 0.88              | 1.67 ± 0.11               | 8.33 ± 0.78                   | 83%                  |
| F1 Day 14 | 15.93 ± 0.65             | 3.52 ± 0.33               | 12.4 ± 0.81                   | 78%                  |
| F1 Day 21 | 19.51 ± 1.71             | 7.94 ± 2.83               | 11.58 ± 0.29                  | 59%                  |
| F2 Day 0  | 9.03 ± 1.68              | 2.08 ± 0.48               | 6.96 ± 1.35                   | 77%                  |
| F2 Day 1  | 8.26 ± 0.26              | 1.74 ± 0.27               | 6.53 ± 0.48                   | 79%                  |
| F2 Day 3  | 8.35 ± 0.59              | 1.96 ± 0.28               | 6.39 ± 0.32                   | 76%                  |
| F2 Day 7  | 18.25 ± 1.21             | 2.44 ± 0.49               | 15.81 ± 2.36                  | 87%                  |
| F2 Day 14 | 17.63 ± 0.94             | 3.6 ± 1.4                 | 14.03 ± 1.52                  | 80%                  |
| F2 Day 21 | 23.04 ± 3.78             | 3.22 ± 0.48               | 19.81 ± 3.53                  | 86%                  |

\*Data previously published (Teixeira et al., 2022)

**Table S15.** Concentration of total, free, and esterified 13-HOTrE in Formula 1- (no DHA) -F1 and Formula 2 (with DHA) - F2 from day 0 to 21.

| 13-HOTrE  |                          |                           |                               |                      |
|-----------|--------------------------|---------------------------|-------------------------------|----------------------|
| Compound  | Total Oxylipins (nmol/L) | Free Oxylipins (nmol/L) * | Esterified Oxylipins (nmol/L) | Esterified Oxylipins |
| F1 Day 0  | 5.49 ± 0.47              | 2.22 ± 0.64               | 3.27 ± 1.18                   | 60%                  |
| F1 Day 1  | 8.12 ± 0.4               | 2.83 ± 0.46               | 5.29 ± 1.67                   | 65%                  |
| F1 Day 3  | 10.37 ± 0.42             | 3.68 ± 0.51               | 6.7 ± 1.9                     | 65%                  |
| F1 Day 7  | 10.08 ± 1.42             | 4.23 ± 0.58               | 5.85 ± 1.77                   | 58%                  |
| F1 Day 14 | 15.79 ± 1.11             | 6.01 ± 1.09               | 9.78 ± 2.28                   | 62%                  |
| F1 Day 21 | 15.94 ± 0.9              | 7.07 ± 2.38               | 8.88 ± 2.18                   | 56%                  |
| F2 Day 0  | 11.83 ± 1.69             | 5.11 ± 0.5                | 6.72 ± 1.91                   | 57%                  |
| F2 Day 1  | 10.52 ± 1.35             | 4.07 ± 0.81               | 6.45 ± 1.86                   | 61%                  |
| F2 Day 3  | 11.04 ± 1.48             | 4.29 ± 1.29               | 6.76 ± 1.91                   | 61%                  |
| F2 Day 7  | 20.54 ± 0.73             | 5.45 ± 1.25               | 15.09 ± 2.71                  | 73%                  |
| F2 Day 14 | 18.4 ± 0.2               | 4.98 ± 2.38               | 13.42 ± 2.6                   | 73%                  |
| F2 Day 21 | 22.3 ± 3.33              | 3.69 ± 0.3                | 18.61 ± 2.92                  | 83%                  |

\*Data previously published (Teixeira et al., 2022)

**Table S16.** Concentration of total, free, and esterified 10(11)-EpDPE in Formula 1- (no DHA) -F1 and Formula 2 (with DHA) - F2 from day 0 to 21.

| <b>10(11)-EpDPE</b> |                                     |                                      |                                          |                                 |
|---------------------|-------------------------------------|--------------------------------------|------------------------------------------|---------------------------------|
| <b>Compound</b>     | <b>Total Oxylipins<br/>(nmol/L)</b> | <b>Free Oxylipins<br/>(nmol/L) *</b> | <b>Esterified Oxylipins<br/>(nmol/L)</b> | <b>Esterified<br/>Oxylipins</b> |
| F1 Day 0            | ND                                  | ND                                   | ND                                       | 100%                            |
| F1 Day 1            | ND                                  | ND                                   | ND                                       | 100%                            |
| F1 Day 3            | ND                                  | ND                                   | ND                                       | 100%                            |
| F1 Day 7            | ND                                  | ND                                   | ND                                       | 100%                            |
| F1 Day 14           | ND                                  | ND                                   | ND                                       | 100%                            |
| F1 Day 21           | ND                                  | ND                                   | ND                                       | 100%                            |
| F2 Day 0            | 10.84 ± 2.52                        | ND                                   | 10.84 ± 2.38                             | 100%                            |
| F2 Day 1            | 10.12 ± 2.76                        | ND                                   | 10.12 ± 2.31                             | 100%                            |
| F2 Day 3            | 8.78 ± 2.45                         | ND                                   | 8.78 ± 2.17                              | 100%                            |
| F2 Day 7            | 3.23 ± 1.52                         | ND                                   | 7 ± 1.95                                 | 100%                            |
| F2 Day 14           | 4.73 ± 1.93                         | 0.12 ± 0.02                          | 6.8 ± 1.92                               | 98%                             |
| F2 Day 21           | 7.32 ± 3.78                         | 0.14 ± 0.03                          | 7.17 ± 1.97                              | 98%                             |

\*Data previously published (Teixeira et al., 2022)

**Table S17.** Concentration of total, free, and esterified 13(14)-EpDPE in Formula 1- (no DHA) -F1 and Formula 2 (with DHA) - F2 from day 0 to 21.

| <b>13(14)-EpDPE</b> |                                     |                                      |                                          |                                 |
|---------------------|-------------------------------------|--------------------------------------|------------------------------------------|---------------------------------|
| <b>Compound</b>     | <b>Total Oxylipins<br/>(nmol/L)</b> | <b>Free Oxylipins<br/>(nmol/L) *</b> | <b>Esterified Oxylipins<br/>(nmol/L)</b> | <b>Esterified<br/>Oxylipins</b> |
| F1 Day 0            | ND                                  | ND                                   | ND                                       | 100%                            |
| F1 Day 1            | ND                                  | ND                                   | ND                                       | 100%                            |
| F1 Day 3            | ND                                  | ND                                   | ND                                       | 100%                            |
| F1 Day 7            | ND                                  | ND                                   | ND                                       | 100%                            |
| F1 Day 14           | ND                                  | ND                                   | ND                                       | 100%                            |
| F1 Day 21           | ND                                  | ND                                   | ND                                       | 100%                            |
| F2 Day 0            | 30.64 ± 7.14                        | ND                                   | 30.64 ± 7.14                             | 100%                            |
| F2 Day 1            | 31.09 ± 9.82                        | ND                                   | 31.09 ± 9.82                             | 100%                            |
| F2 Day 3            | 25.22 ± 10.42                       | ND                                   | 25.22 ± 10.42                            | 100%                            |
| F2 Day 7            | 7.34 ± 2.99                         | ND                                   | 7.34 ± 2.99                              | 100%                            |
| F2 Day 14           | 14.15 ± 8.16                        | ND                                   | 14.15 ± 8.16                             | 100%                            |
| F2 Day 21           | 18.86 ± 11.34                       | 0.06 ± 0.01                          | 18.8 ± 11.33                             | 100%                            |

\*Data previously published (Teixeira et al., 2022)

**Table S18.** Concentration of total, free, and esterified 16(17)-EpDPE in Formula 1- (no DHA) -F1 and Formula 2 (with DHA) - F2 from day 0 to 21.

| <b>16(17)-EpDPE</b> |                                     |                                      |                                          |                                 |
|---------------------|-------------------------------------|--------------------------------------|------------------------------------------|---------------------------------|
| <b>Compound</b>     | <b>Total Oxylipins<br/>(nmol/L)</b> | <b>Free Oxylipins<br/>(nmol/L) *</b> | <b>Esterified Oxylipins<br/>(nmol/L)</b> | <b>Esterified<br/>Oxylipins</b> |
| F1 Day 0            | ND                                  | ND                                   | ND                                       | 100%                            |
| F1 Day 1            | ND                                  | ND                                   | ND                                       | 100%                            |
| F1 Day 3            | ND                                  | ND                                   | ND                                       | 100%                            |
| F1 Day 7            | ND                                  | ND                                   | ND                                       | 100%                            |
| F1 Day 14           | ND                                  | ND                                   | ND                                       | 100%                            |
| F1 Day 21           | ND                                  | ND                                   | ND                                       | 100%                            |
| F2 Day 0            | 25.91 ± 4.24                        | ND                                   | 25.91 ± 4.24                             | 100%                            |
| F2 Day 3            | 37.25 ± 7                           | ND                                   | 37.25 ± 7                                | 100%                            |
| F2 Day 3            | 33.55 ± 3                           | ND                                   | 33.55 ± 3                                | 100%                            |
| F2 Day 7            | 29.67 ± 2.87                        | ND                                   | 29.67 ± 2.87                             | 100%                            |
| F2 Day 14           | 29.72 ± 2.66                        | 0.14 ± 0.03                          | 29.58 ± 2.67                             | 99%                             |
| F2 Day 21           | 38.12 ± 5.27                        | 0.08 ± 0.01                          | 38.05 ± 5.27                             | 100%                            |

\*Data previously published (Teixeira et al., 2022)

**Table S19.** Concentration of total, free, and esterified 19(20)-EpDPE in Formula 1- (no DHA) -F1 and Formula 2 (with DHA) - F2 from day 0 to 21.

| <b>19(20)-EpDPE</b> |                                     |                                      |                                          |                                 |
|---------------------|-------------------------------------|--------------------------------------|------------------------------------------|---------------------------------|
| <b>Compound</b>     | <b>Total Oxylipins<br/>(nmol/L)</b> | <b>Free Oxylipins<br/>(nmol/L) *</b> | <b>Esterified Oxylipins<br/>(nmol/L)</b> | <b>Esterified<br/>Oxylipins</b> |
| F1 Day 0            | ND                                  | ND                                   | ND                                       | 100%                            |
| F1 Day 1            | ND                                  | ND                                   | ND                                       | 100%                            |
| F1 Day 3            | ND                                  | ND                                   | ND                                       | 100%                            |
| F1 Day 7            | ND                                  | ND                                   | ND                                       | 100%                            |
| F1 Day 14           | ND                                  | ND                                   | ND                                       | 100%                            |
| F1 Day 21           | ND                                  | ND                                   | ND                                       | 100%                            |
| F2 Day 0            | 84.98 ± 16.65                       | ND                                   | 84.98 ± 16.65                            | 100%                            |
| F2 Day 3            | 88.27 ± 30.86                       | ND                                   | 88.27 ± 30.86                            | 100%                            |
| F2 Day 3            | 79.51 ± 23.51                       | ND                                   | 79.51 ± 23.51                            | 100%                            |
| F2 Day 7            | 34.33 ± 11.27                       | ND                                   | 34.33 ± 11.27                            | 100%                            |
| F2 Day 14           | 48.39 ± 27.35                       | 0.33 ± 0.07                          | 48.06 ± 27.3                             | 99%                             |
| F2 Day 21           | 70.05 ± 36.00                       | 0.27 ± 0.03                          | 69.78 ± 36.03                            | 100%                            |

\*Data previously published (Teixeira et al., 2022)

**Table S20.** Concentration of total, free, and esterified 17-HDoHE in Formula 1- (no DHA) -F1 and Formula 2 (with DHA) - F2 from day 0 to 21.

| 17-HDoHE  |                             |                              |                                  |                         |
|-----------|-----------------------------|------------------------------|----------------------------------|-------------------------|
| Compound  | Total Oxylipins<br>(nmol/L) | Free Oxylipins<br>(nmol/L) * | Esterified Oxylipins<br>(nmol/L) | Esterified<br>Oxylipins |
| F1 Day 0  | ND                          | ND                           | ND                               | 100%                    |
| F1 Day 1  | 0.11 ± 0.21                 | ND                           | 0.11 ± 0.3                       | 100%                    |
| F1 Day 3  | 0.06 ± 0.3                  | ND                           | 0.06 ± 0.07                      | 100%                    |
| F1 Day 7  | 0.02 ± 0.07                 | ND                           | 0.02 ± 0.39                      | 100%                    |
| F1 Day 14 | 0.05 ± 0.39                 | ND                           | 0.05 ± 0.26                      | 100%                    |
| F1 Day 21 | 0.1 ± 0.26                  | ND                           | 0.1 ± 3.56                       | 100%                    |
| F2 Day 0  | 20.8 ± 3.56                 | ND                           | 20.8 ± 3.56                      | 100%                    |
| F2 Day 3  | 15.3 ± 2.18                 | ND                           | 15.3 ± 2.18                      | 100%                    |
| F2 Day 3  | 18.47 ± 2.64                | ND                           | 18.47 ± 2.64                     | 100%                    |
| F2 Day 7  | 20.06 ± 2.9                 | ND                           | 20.06 ± 2.9                      | 100%                    |
| F2 Day 14 | 30.87 ± 0.32                | 1.39 ± 0.61                  | 29.49 ± 0.57                     | 96%                     |
| F2 Day 21 | 55.59 ± 8.12                | 2.15 ± 1.05                  | 53.44 ± 8.74                     | 96%                     |

\*Data previously published (Teixeira et al., 2022)

Abbreviations: EpETre (epoxyeicosatrienoic acid), HETE (hydroxyeicosatetraenoic acid), EpDPE (epoxydocosapentanoic acid), HDoHE (hydroxydocosahexaenoic acid), EpOME (epoxyoctadecenoic acid); DiHOME (dihydroxyoctadecenoic acid), TriHOME (trihydroxyoctadecenoic acid), HODE (hydroxyoctadecadienoic acid), oxo-ODE (oxo-octadecadienoic acid), HOTrE (hydroxyoctadecatrienoic acid) DiHETrE (dihydroxyeicosatrienoic acid), HEPE (hydroxyeicosapentaenoic acid) and TXB2 (thromboxane B2).

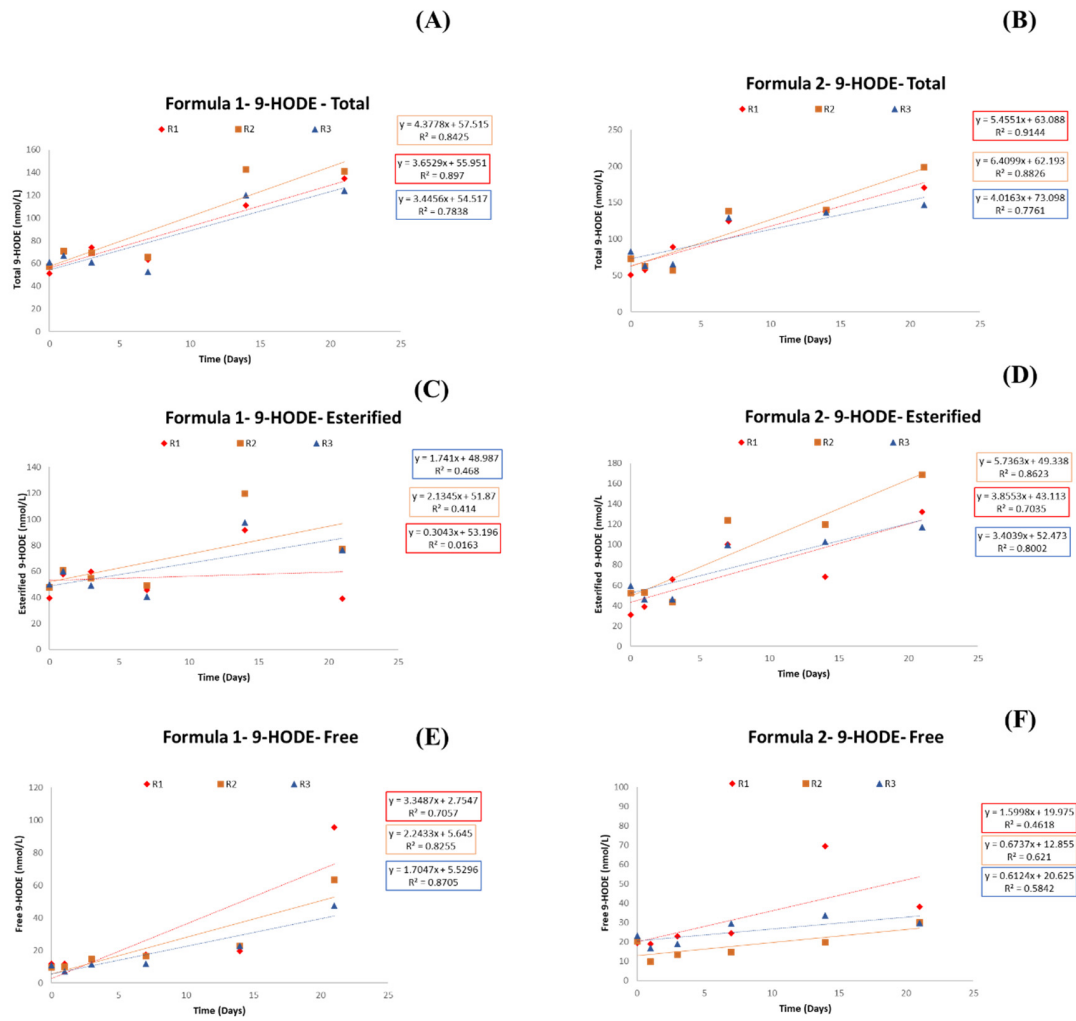

**Figure S1.** Linear regression fit for Concentration vs. Time plots of total, esterified, and free 9-HODE formed in milk infant Formula 1 (no DHA) and Formula 2 (with DHA) under 21 days of storage.

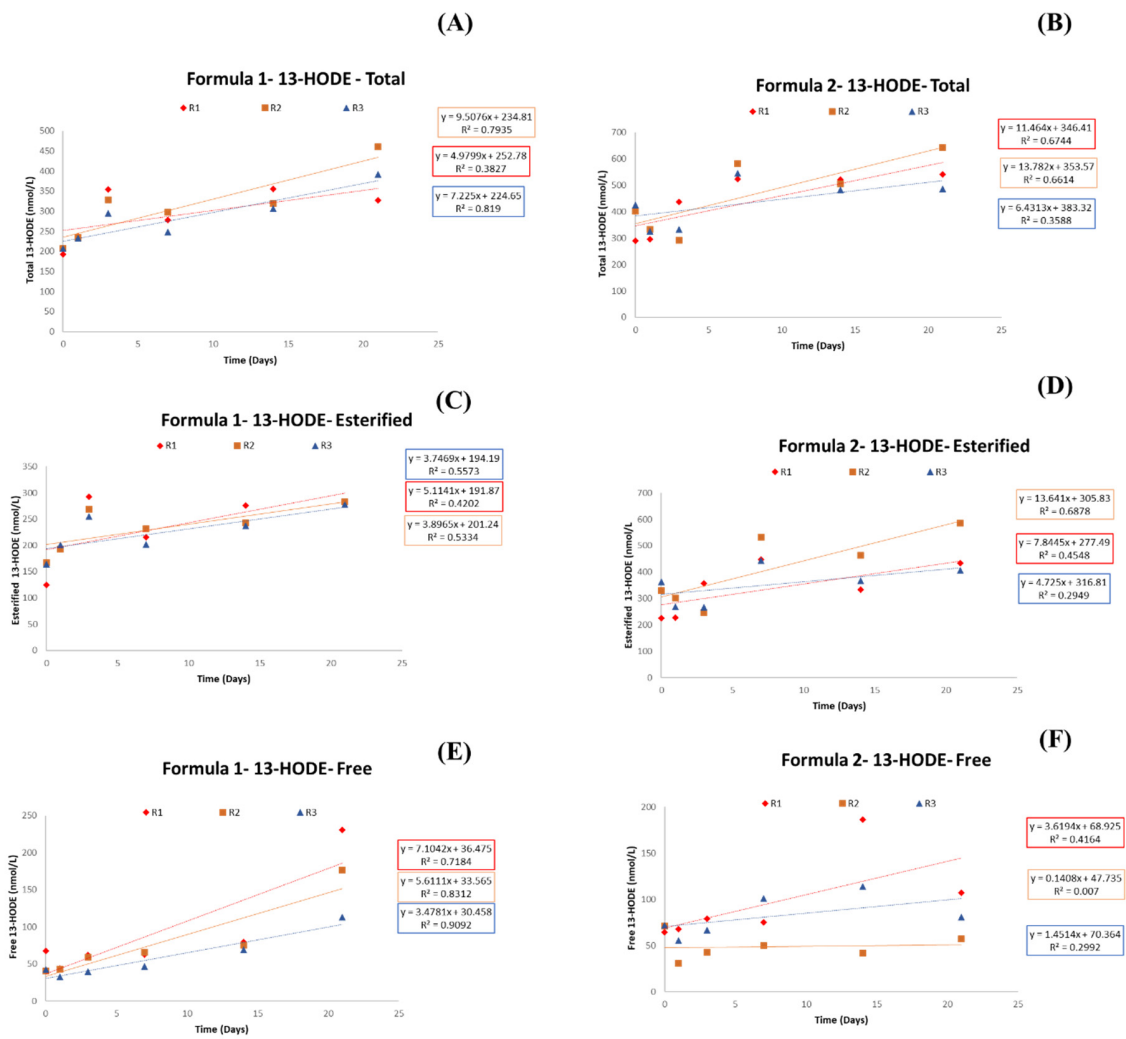

**Figure S2.** Linear regression fit for Concentration vs. Time plots of total, esterified, and free 13-HODE formed in milk infant Formula 1 (no DHA) and Formula 2 (with DHA) under 21 days of storage.

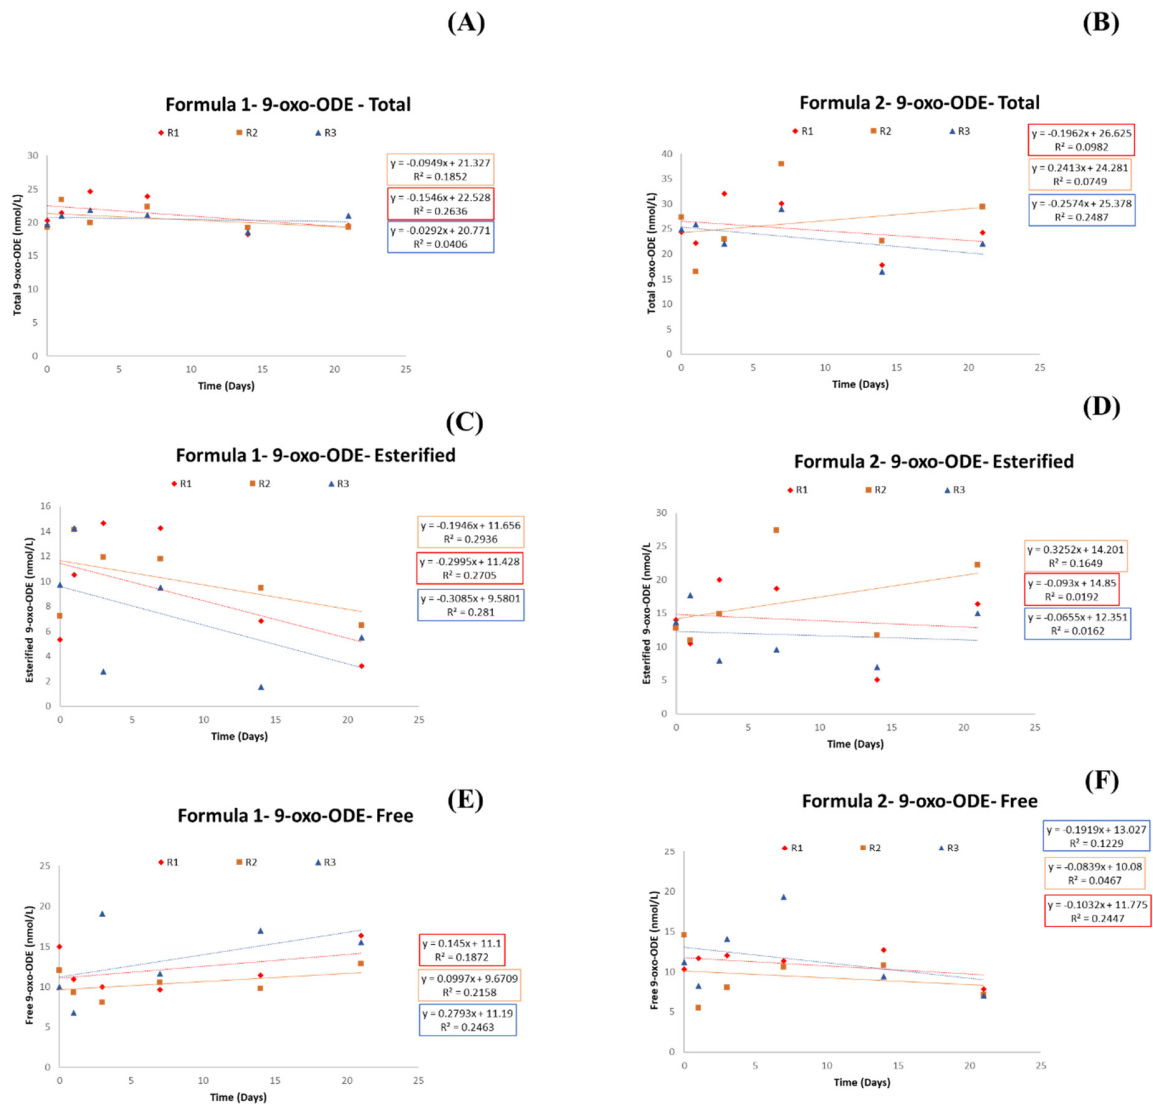

**Figure S3.** Linear regression fit for Concentration vs. Time plots of total, esterified, and free 9-oxo-ODE formed in milk infant Formula 1 (no DHA) and Formula 2 (with DHA) under 21 days of storage.



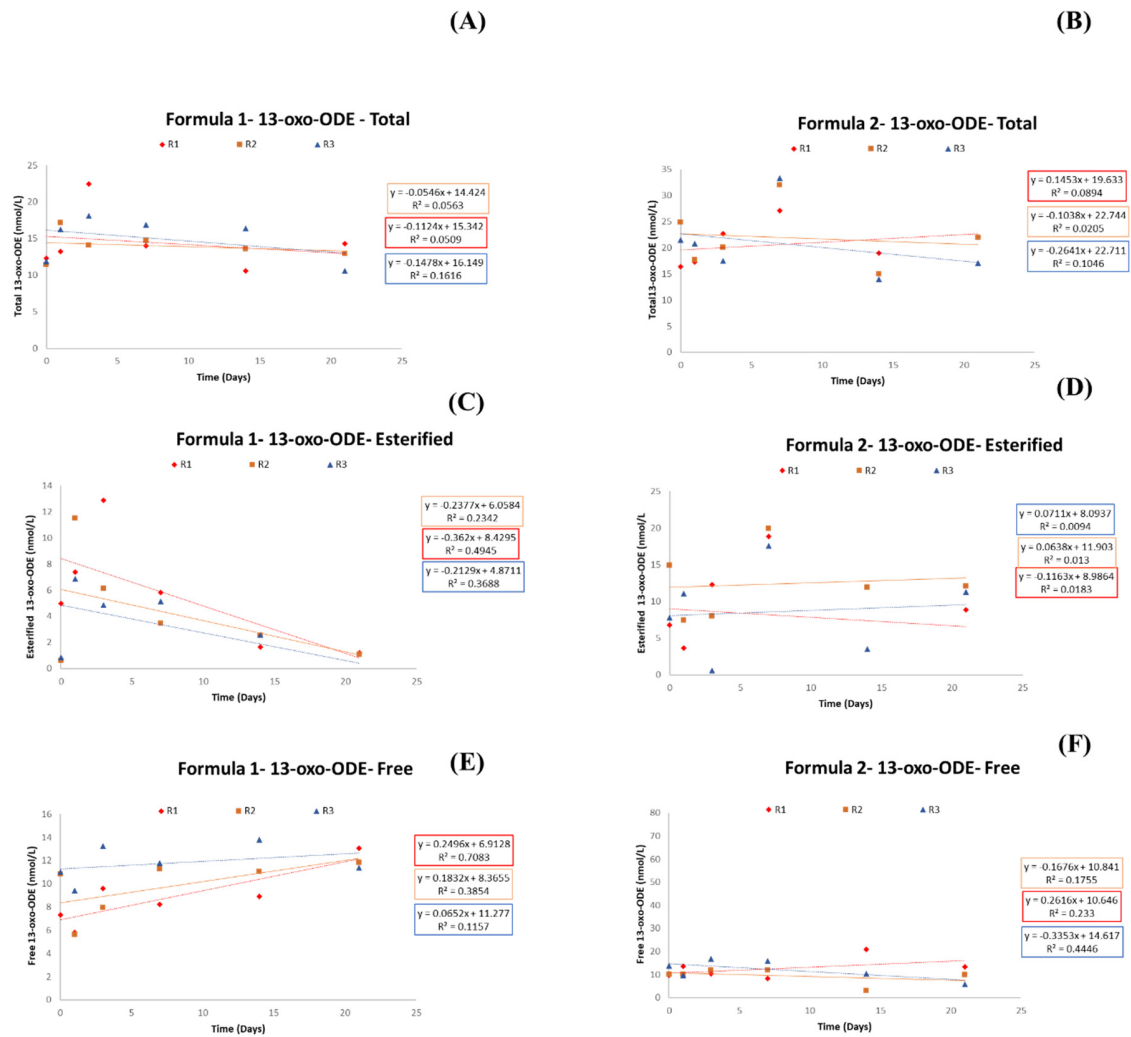

**Figure S4.** Linear regression fit for Concentration vs. Time plots of total, esterified, and free 13-oxo-ODE formed in milk infant Formula 1 (no DHA) and Formula 2 (with DHA) under 21 days of storage.

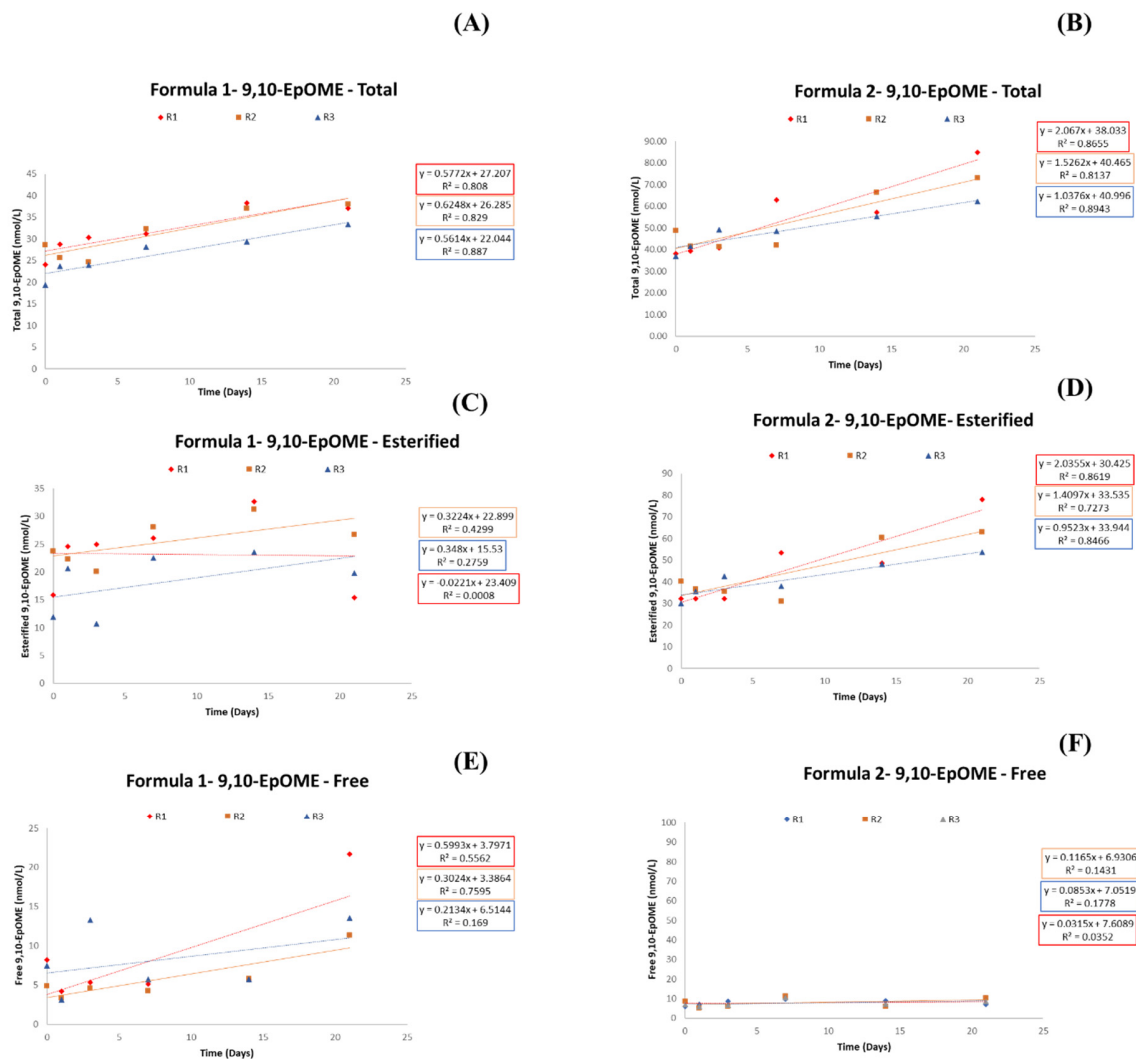

**Figure S5.** Linear regression fit for Concentration vs. Time plots of total, esterified, and free 9(10)-EpOME formed in milk infant Formula 1 (no DHA) and Formula 2 (with DHA) under 21 days of storage.

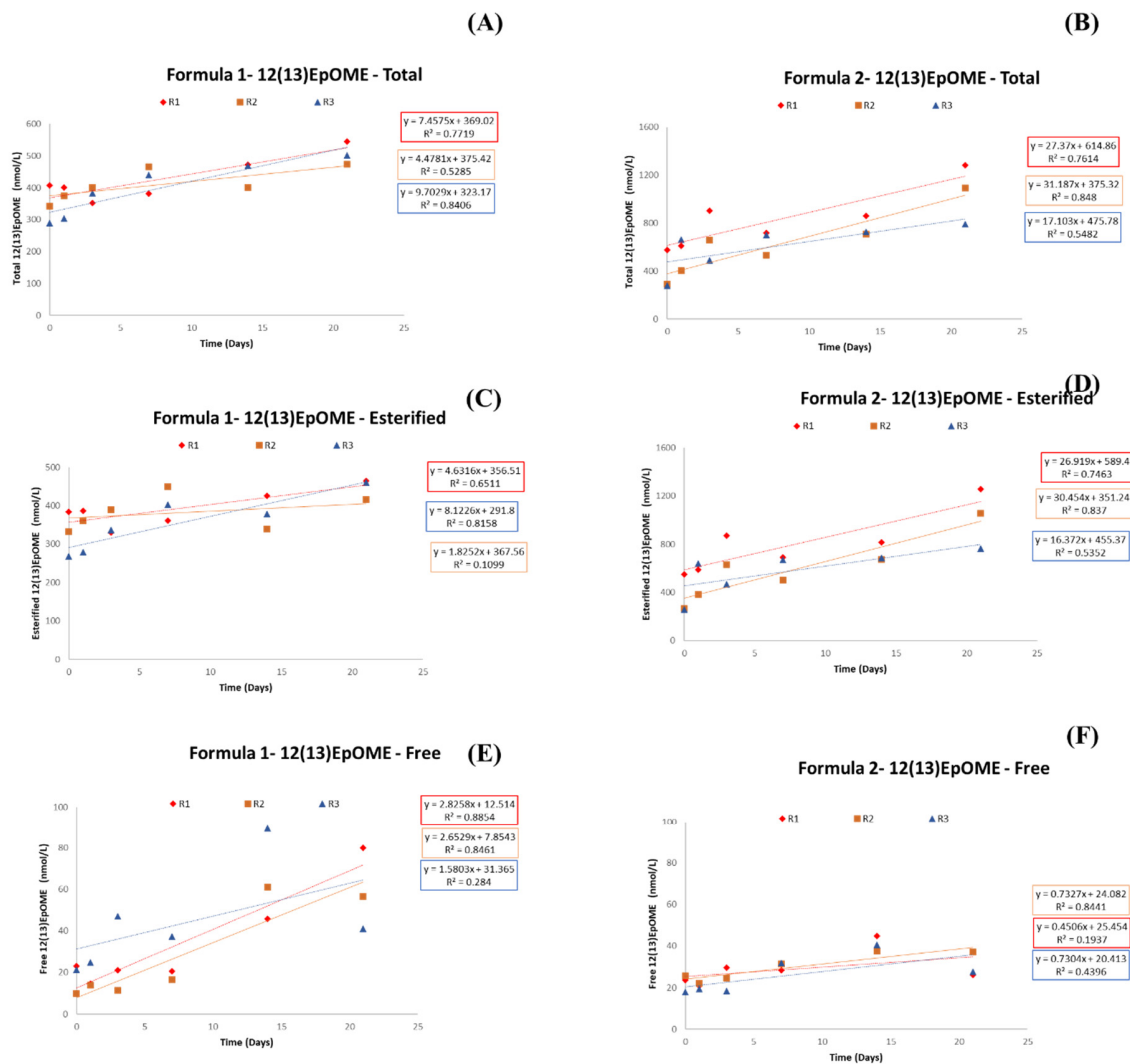

**Figure S6.** Linear regression fit for Concentration vs. Time plots of total, esterified, and free 12(13)-EpOME formed in milk infant Formula 1 (no DHA) and Formula 2 (with DHA) under 21 days of storage.

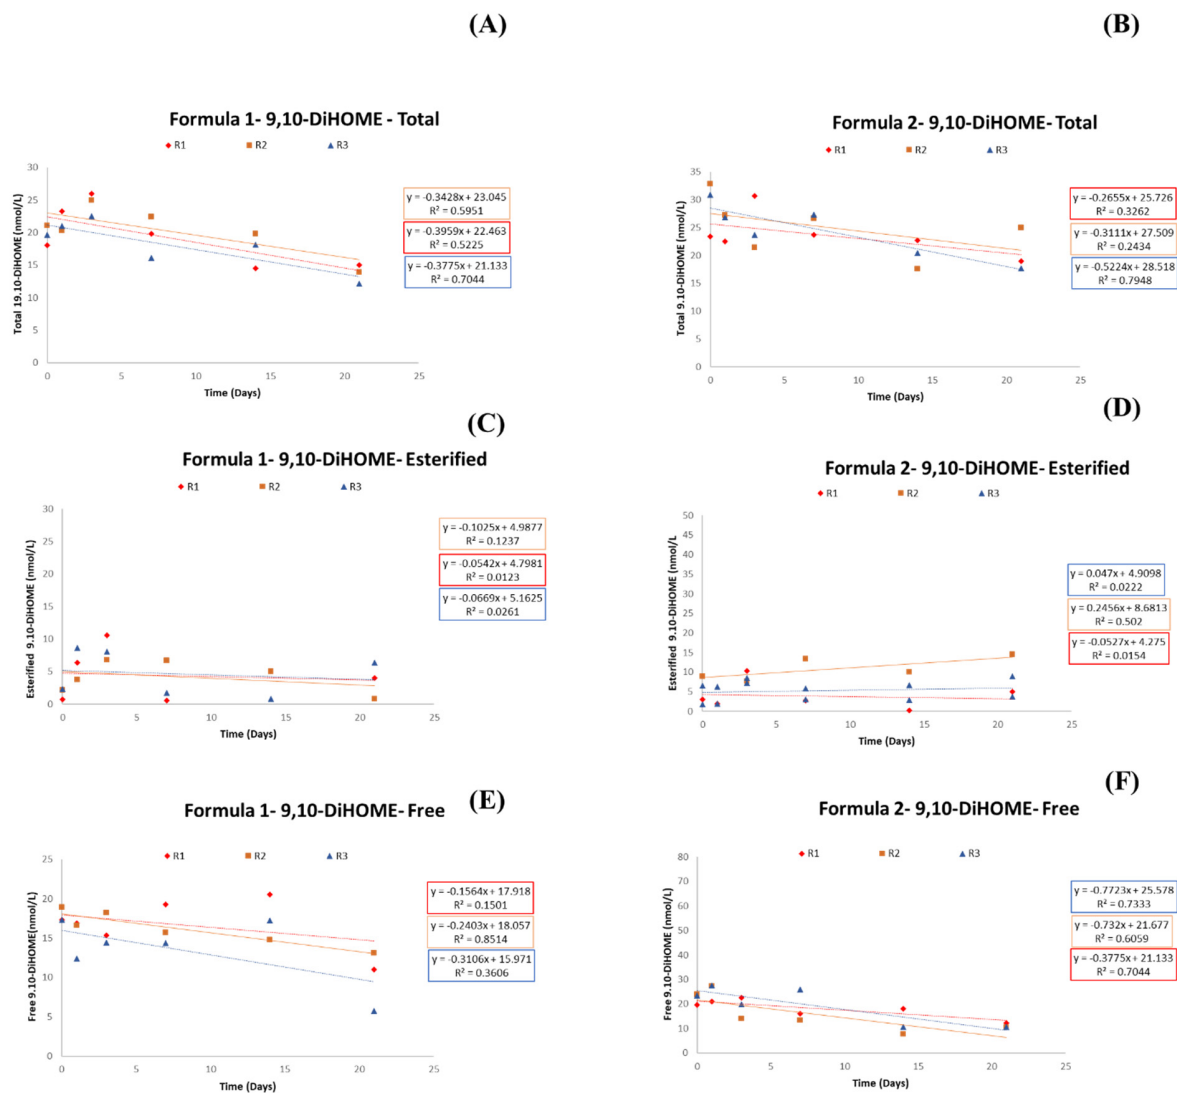

**Figure S7.** Linear regression fit for Concentration vs. Time plots of total, esterified, and free 9,10-DiHOME formed in milk infant Formula 1 (no DHA) and Formula 2 (with DHA) under 21 days of storage.

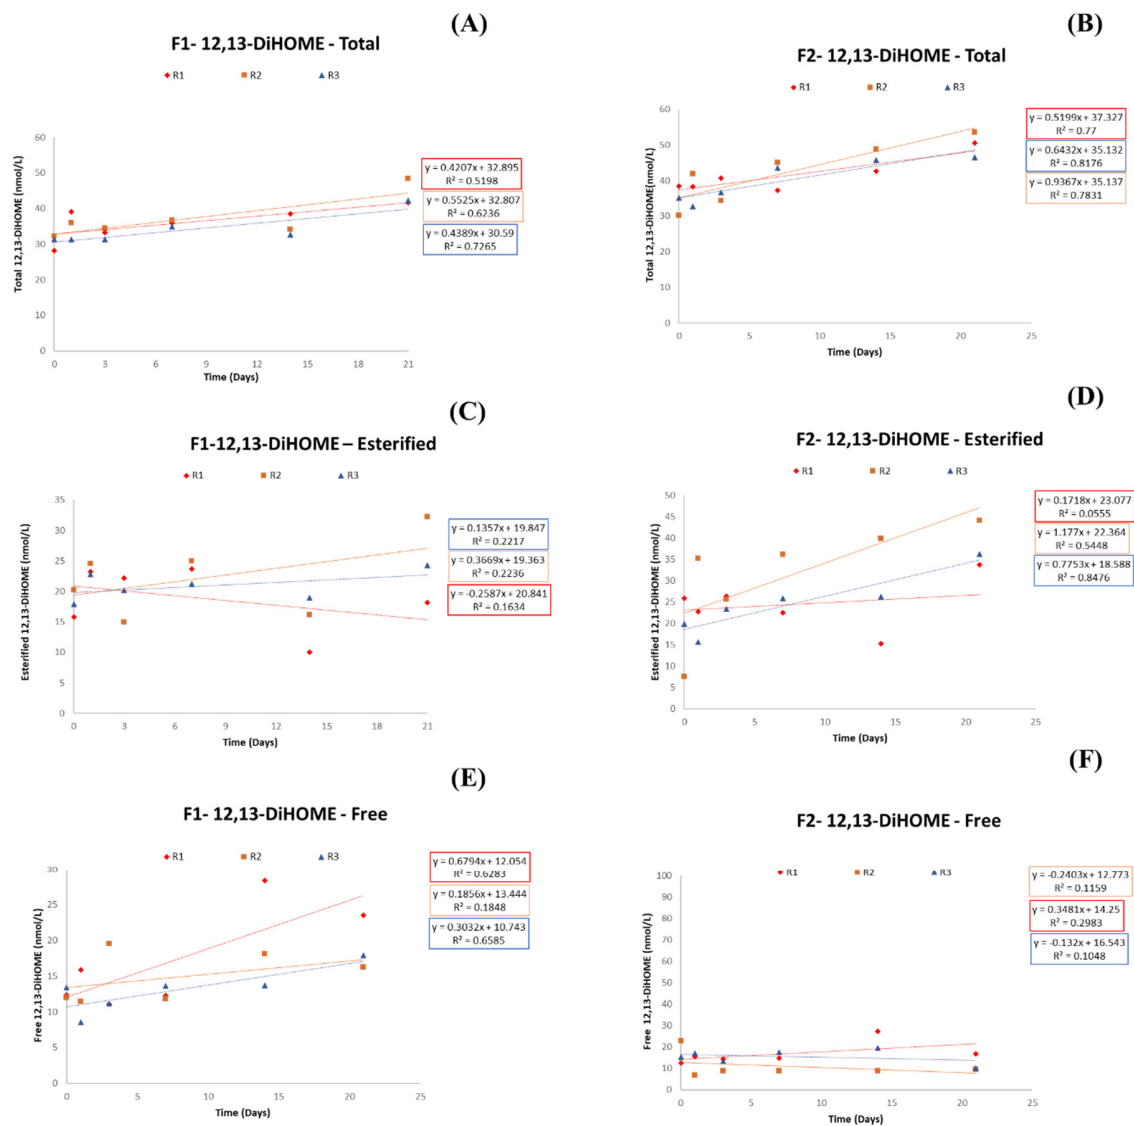

**Figure S8.** Linear regression fit for Concentration vs. Time plots of total, esterified, and free 12,13-DiHOME formed in milk infant Formula 1 (no DHA) and Formula 2 (with DHA) under 21 days of storage.

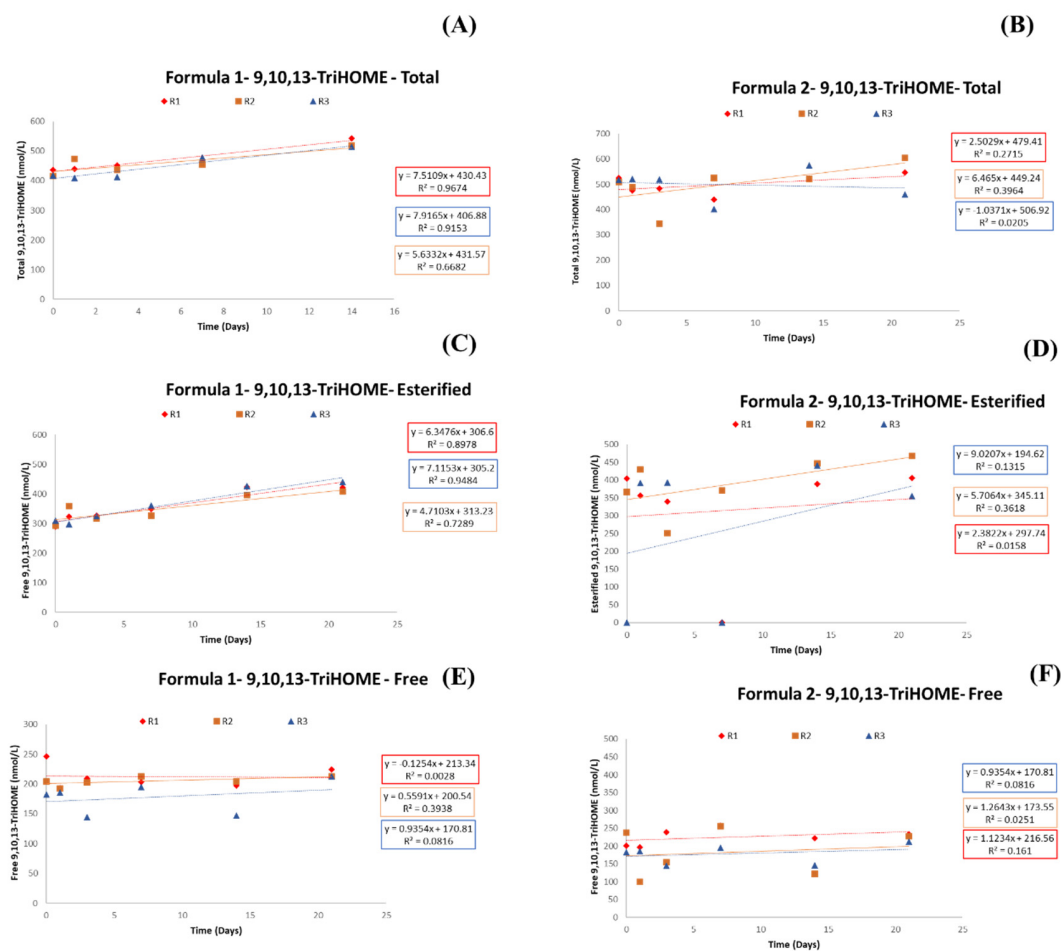

**Figure S9.** Linear regression fit for Concentration vs. Time plots of total, esterified, and free 9,10,13-TriHOME formed in milk infant Formula 1 (no DHA) and Formula 2 (with DHA) under 21 days of storage.

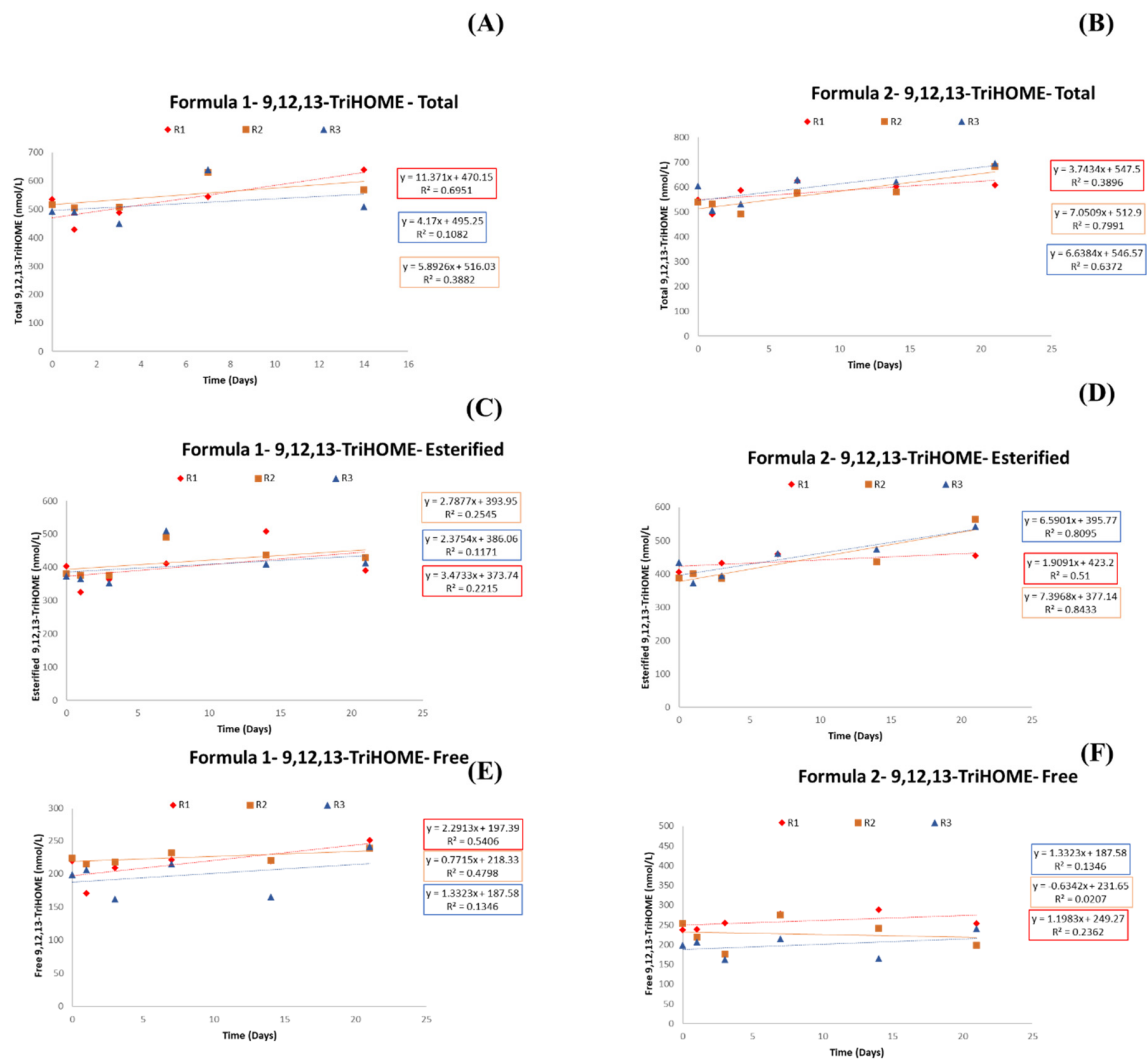

**Figure S10.** Linear regression fit for Concentration vs. Time plots of total, esterified, and free 9,12,13-TriHOME formed in milk infant Formula 1 (no DHA) and Formula 2 (with DHA) under 21 days of storage.

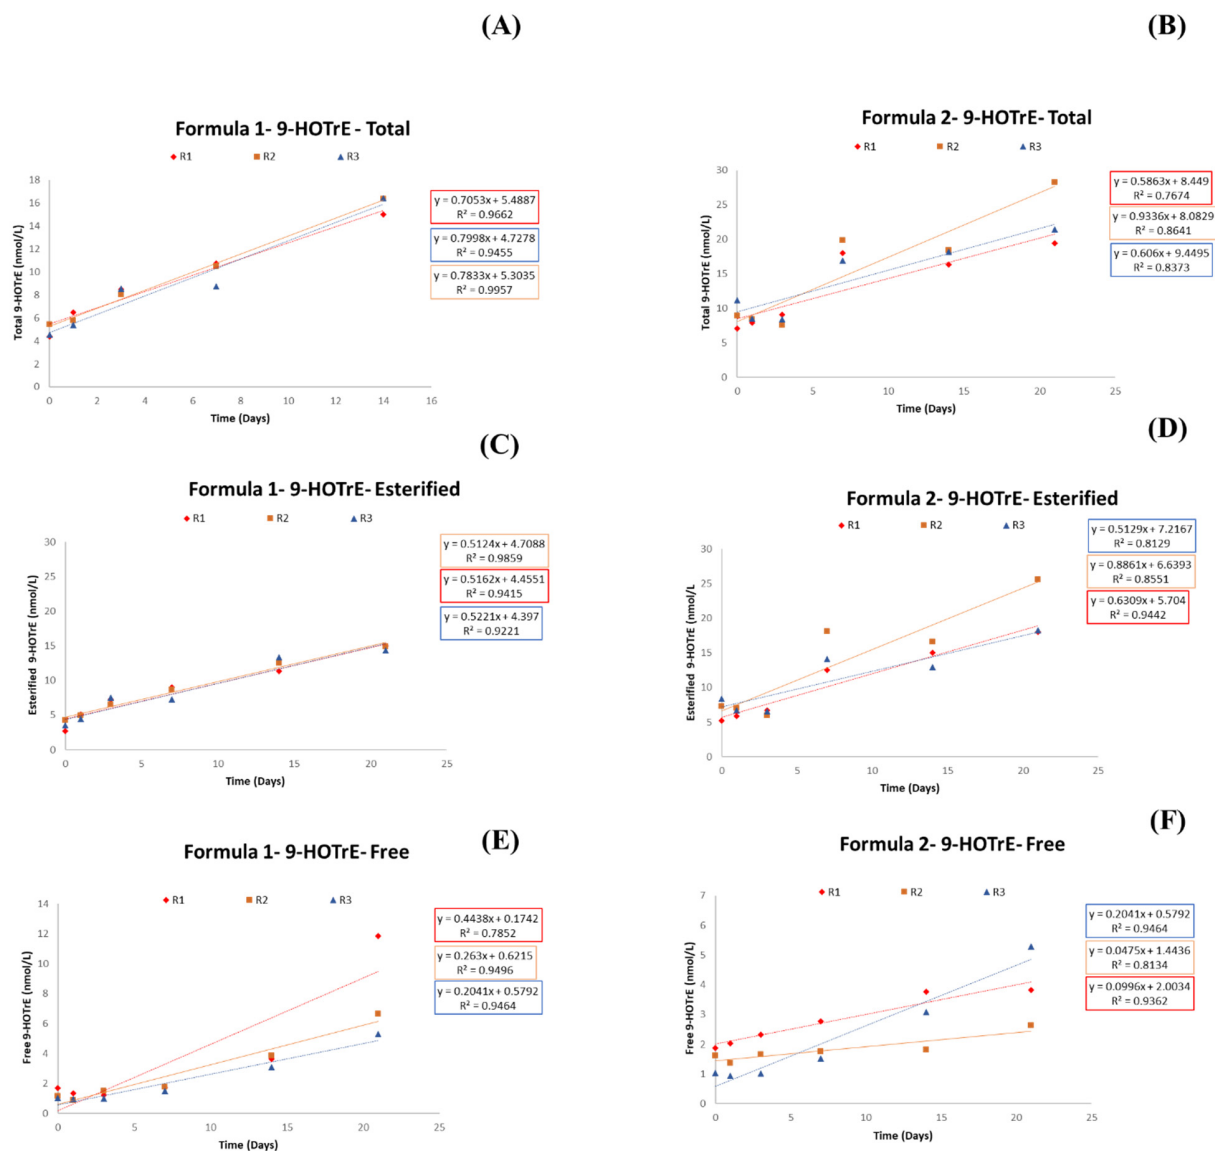

**Figure S11.** Linear regression fit for Concentration vs. Time plots of total, esterified, and free 9-HOTrE formed in milk infant Formula 1 (no DHA) and Formula 2 (with DHA) under 21 days of storage.



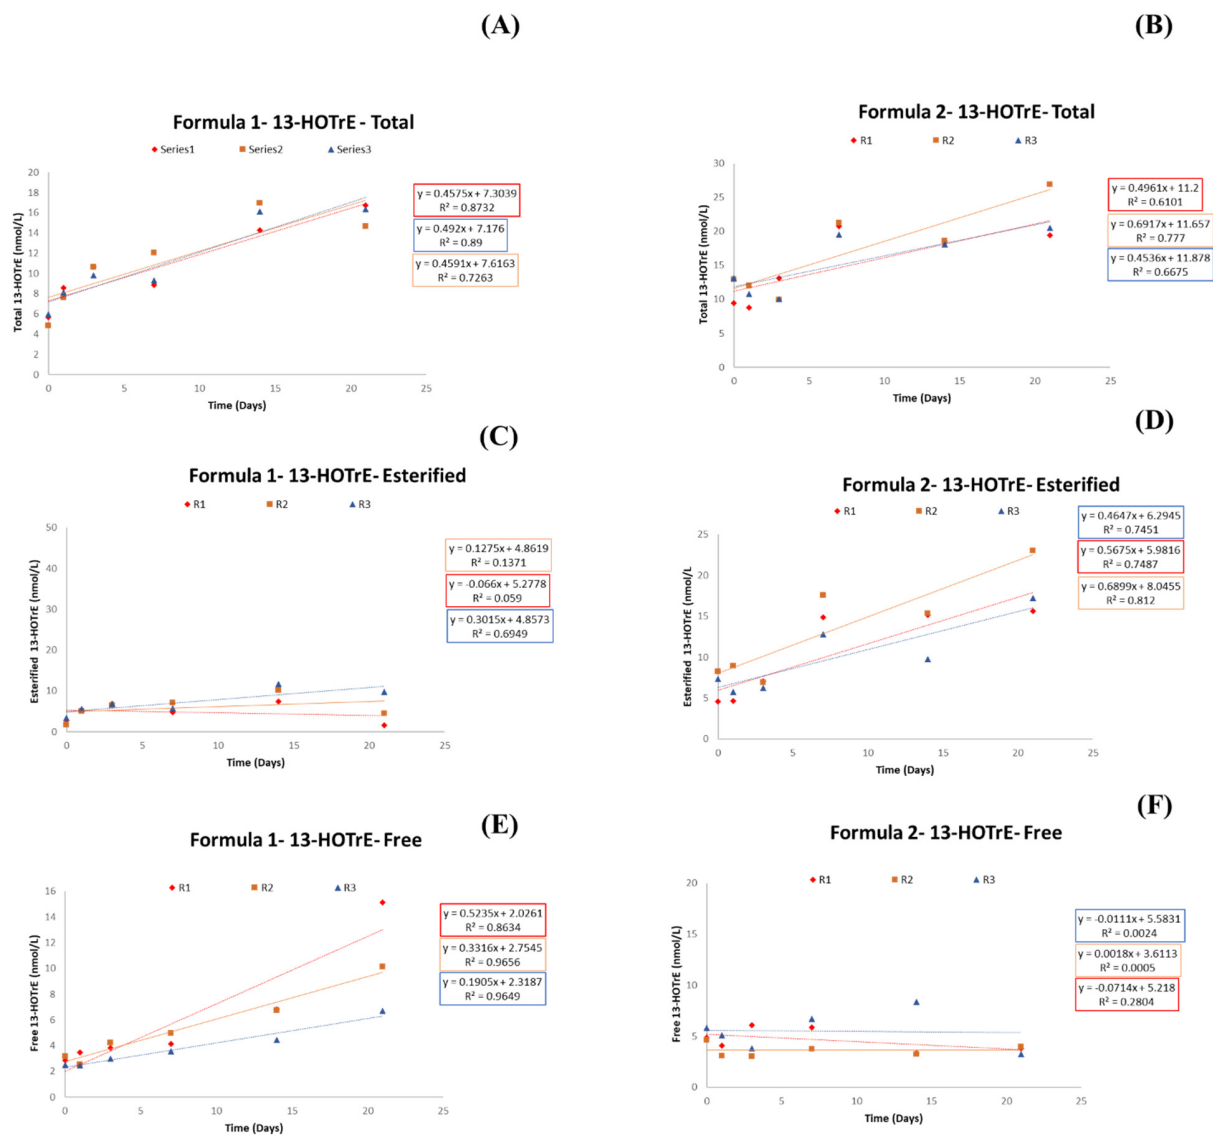

**Figure S12.** Linear regression fit for Concentration vs. Time plots of total, esterified, and free 13-HOTrE formed in milk infant Formula 1 (no DHA) and Formula 2 (with DHA) under 21 days of storage.

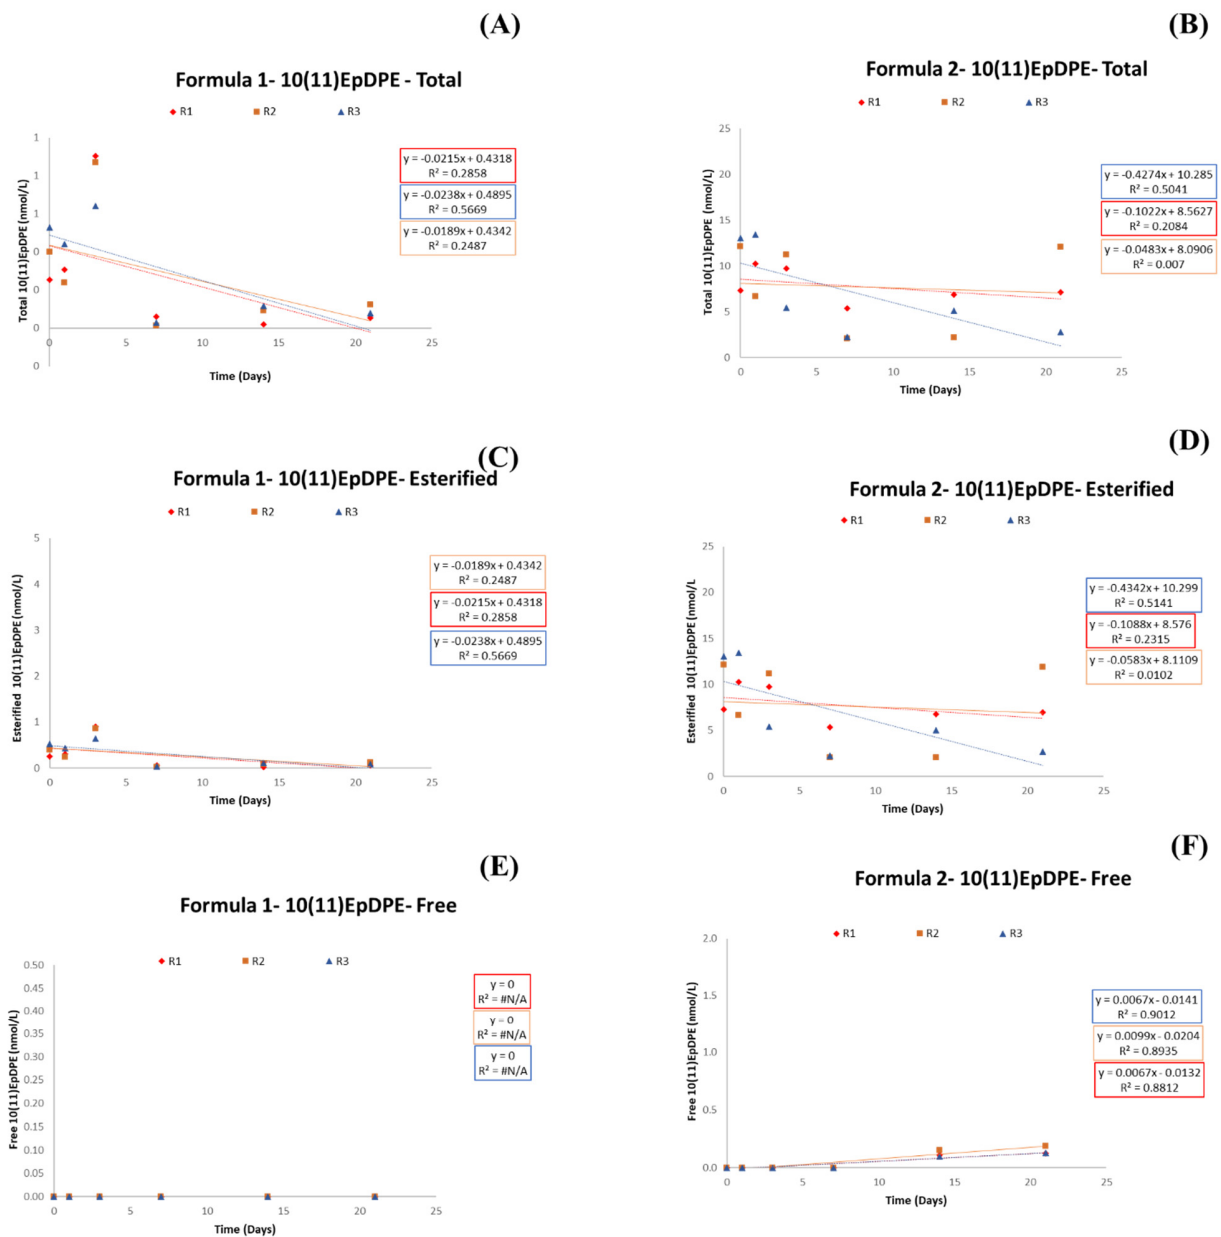

**Figure S13.** Linear regression fit for Concentration vs. Time plots of total, esterified, and free 10(11)-EpDPE formed in milk infant Formula 1 (no DHA) and Formula 2 (with DHA) under 21 days of storage.

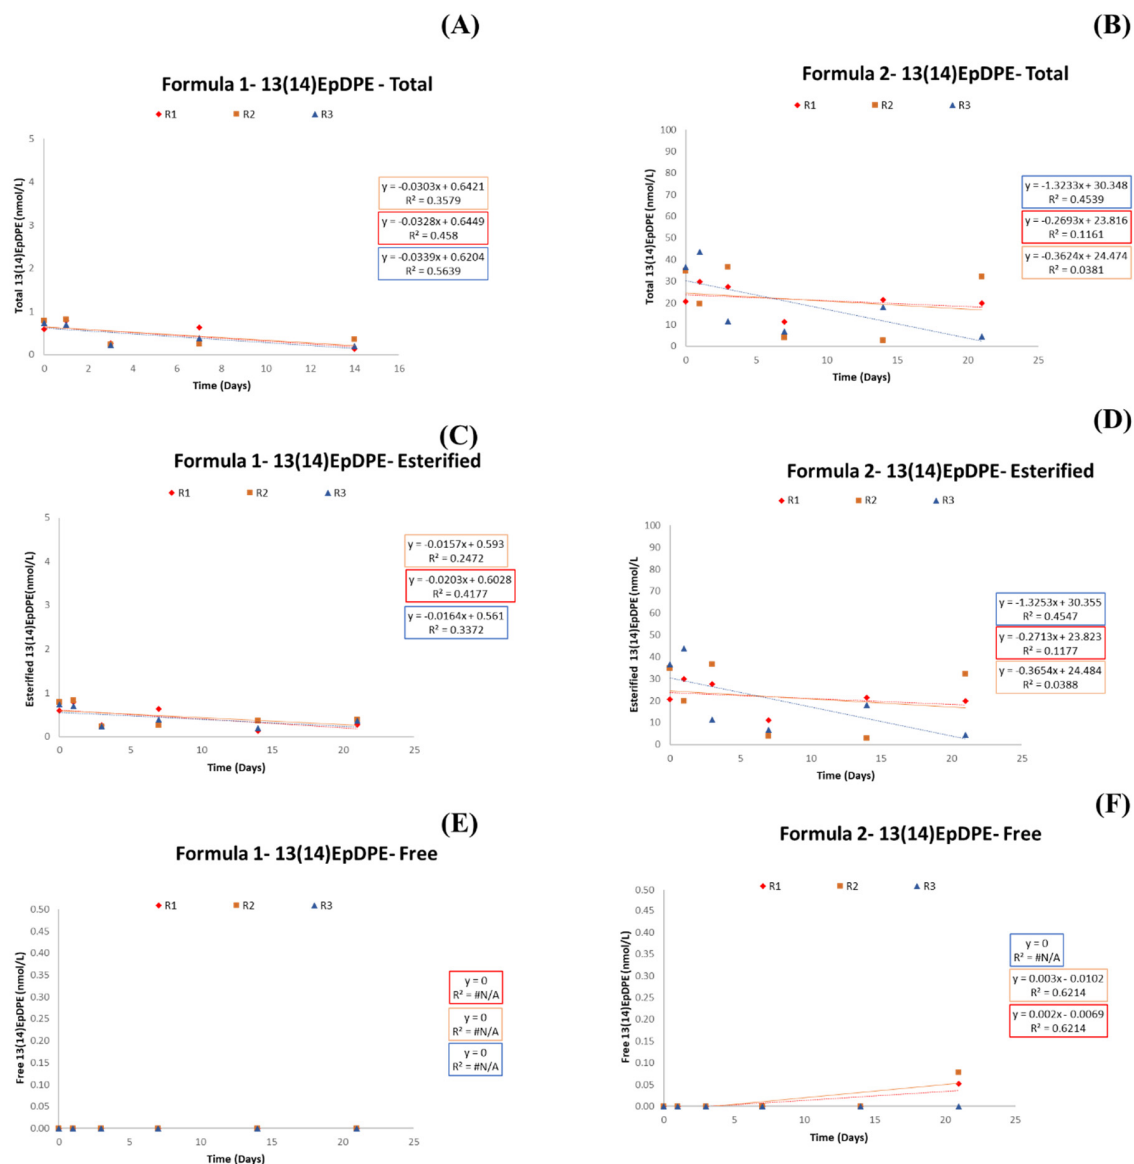

**Figure S14.** Linear regression fit for Concentration vs. Time plots of total, esterified, and free 13(14)-EpDPE formed in milk infant Formula 1 (no DHA) and Formula 2 (with DHA) under 21 days of storage.

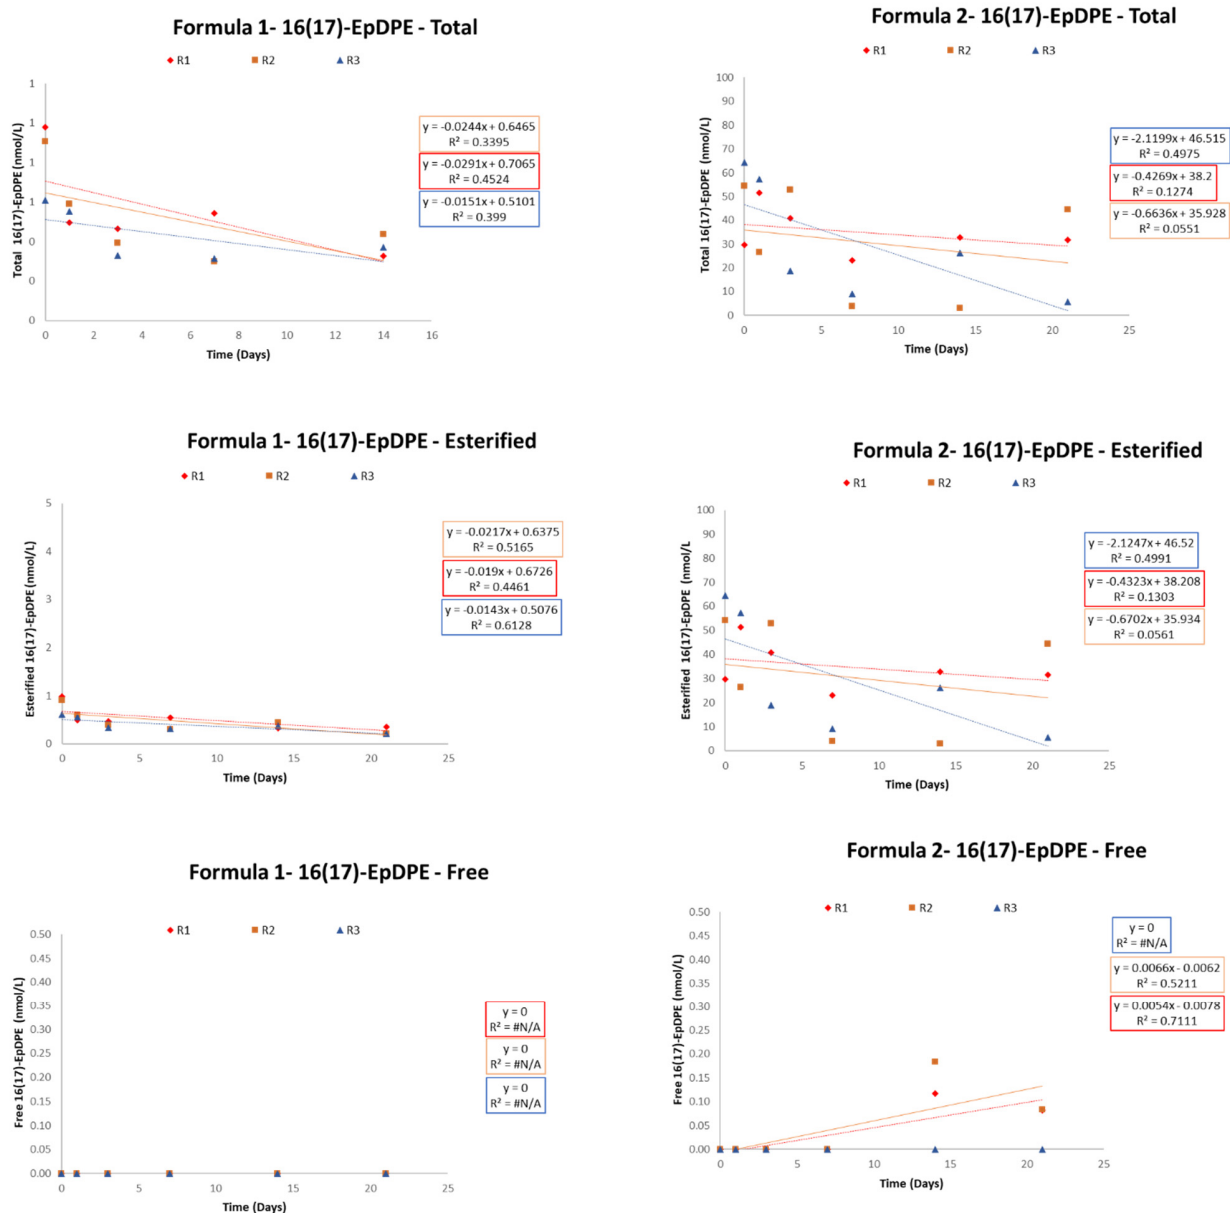

**Figure S15.** Linear regression fit for Concentration vs. Time plots of total, esterified, and free 16(17)-EpDPE formed in milk infant Formula 1 (no DHA) and Formula 2 (with DHA) under 21 days of storage.

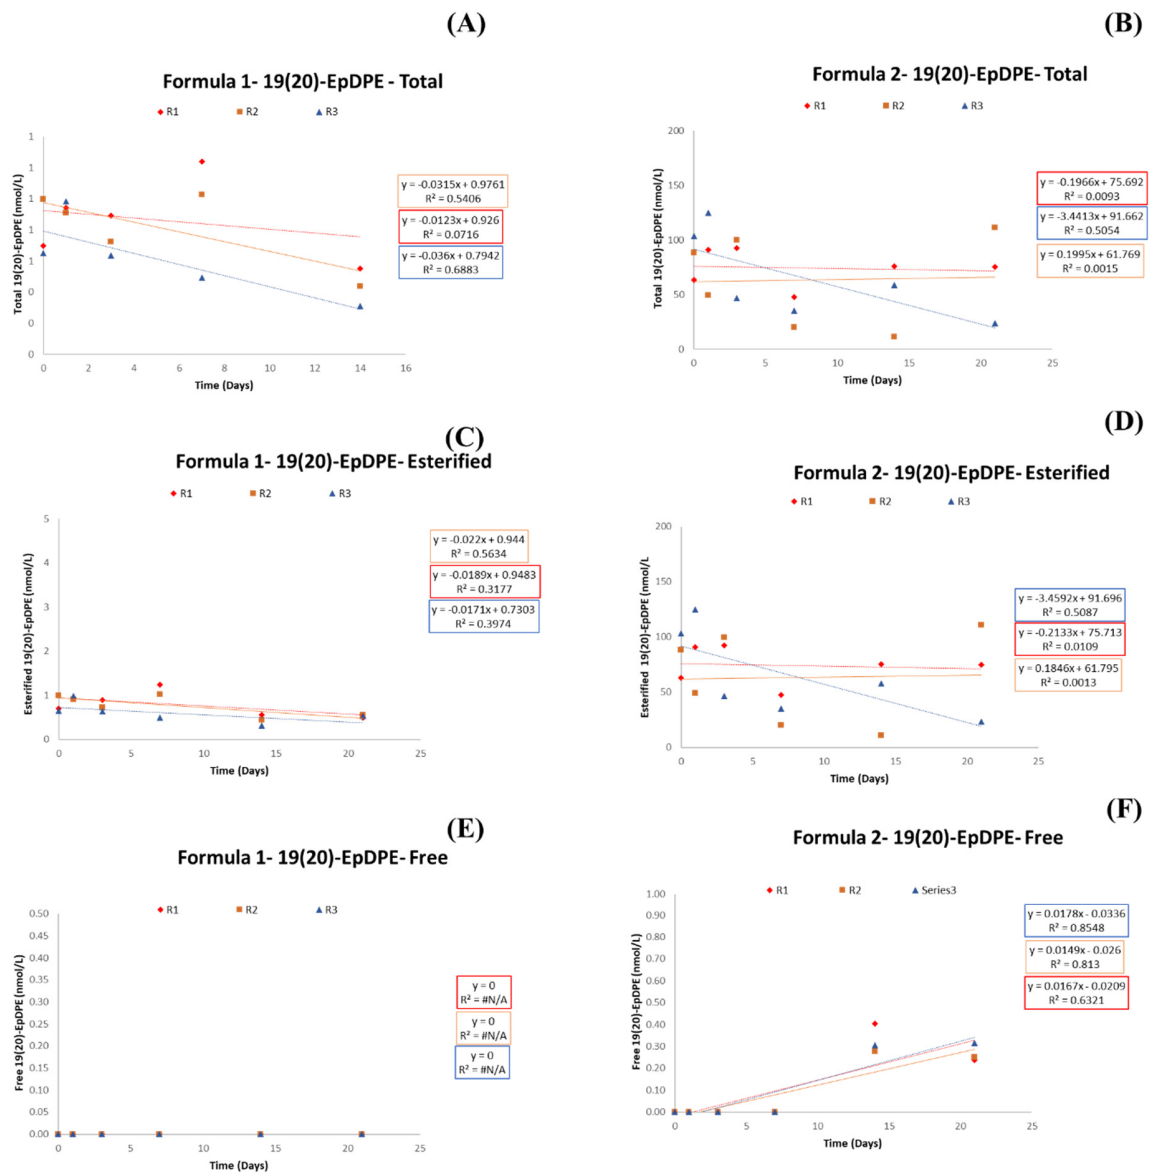

**Figure S16.** Linear regression fit for Concentration vs. Time plots of total, esterified, and free 19(20)-EpDPE formed in milk infant Formula 1 (no DHA) and Formula 2 (with DHA) under 21 days of storage.

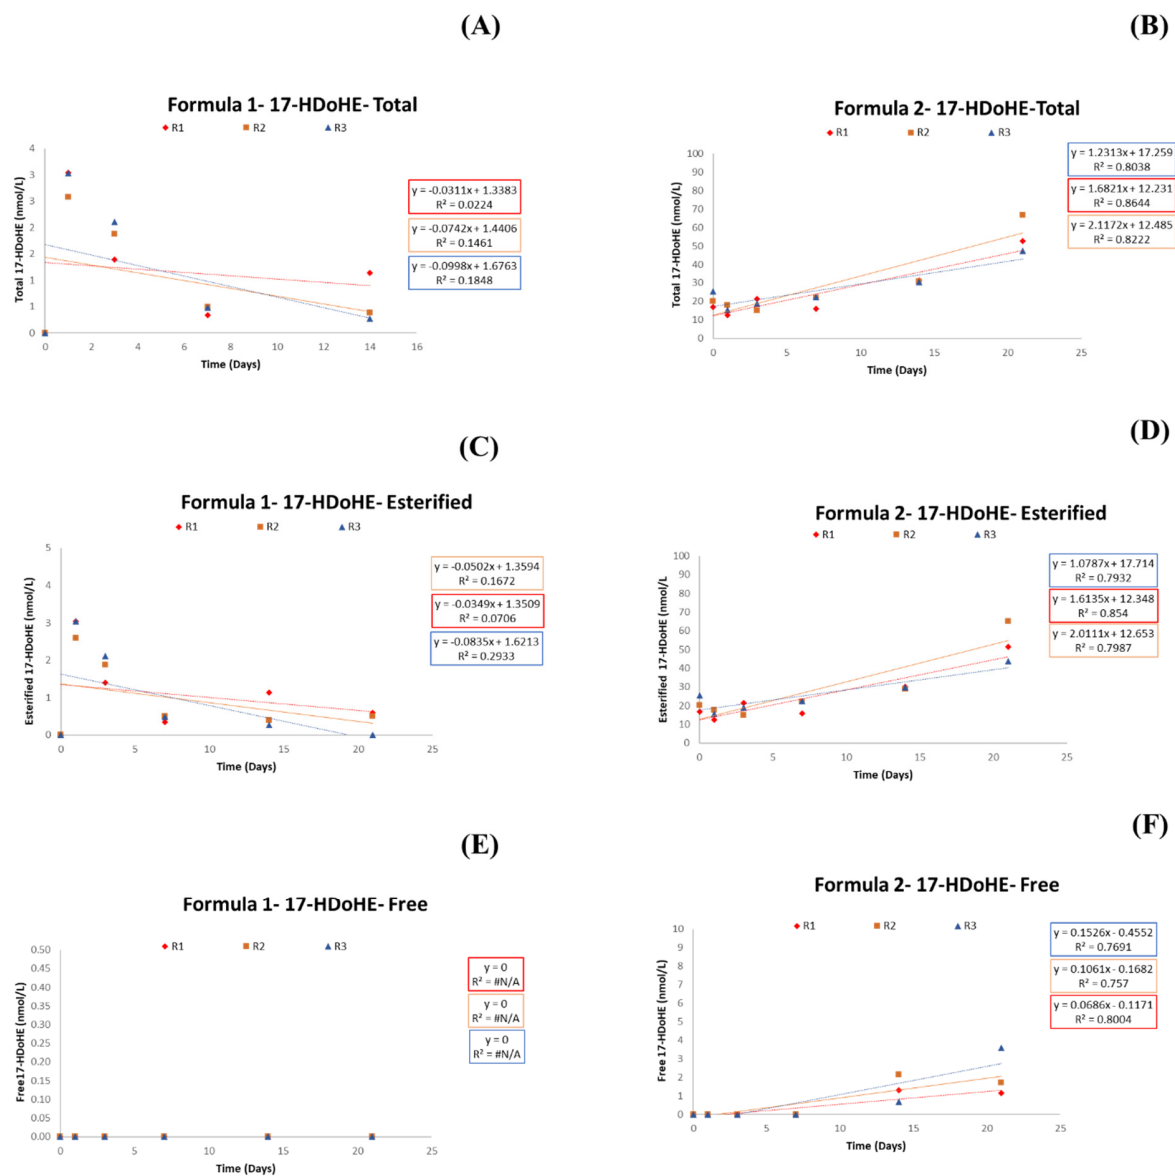

**Figure S17.** Linear regression fit for Concentration vs. Time plots of total, esterified, and free 17-HDoHE formed in milk infant Formula 1 (no DHA) and Formula 2 (with DHA) under 21 days of storage.
